# Supplementary material for: Efficacy of lysostaphin-coated titanium plates on implant-associated MRSA osteitis in minipigs
Source: Springer Nature journal article supplement (doi:10.1007/s00068-024-02448-4), 2024-01-24

Control Group / No Infection  
Fig No. 6

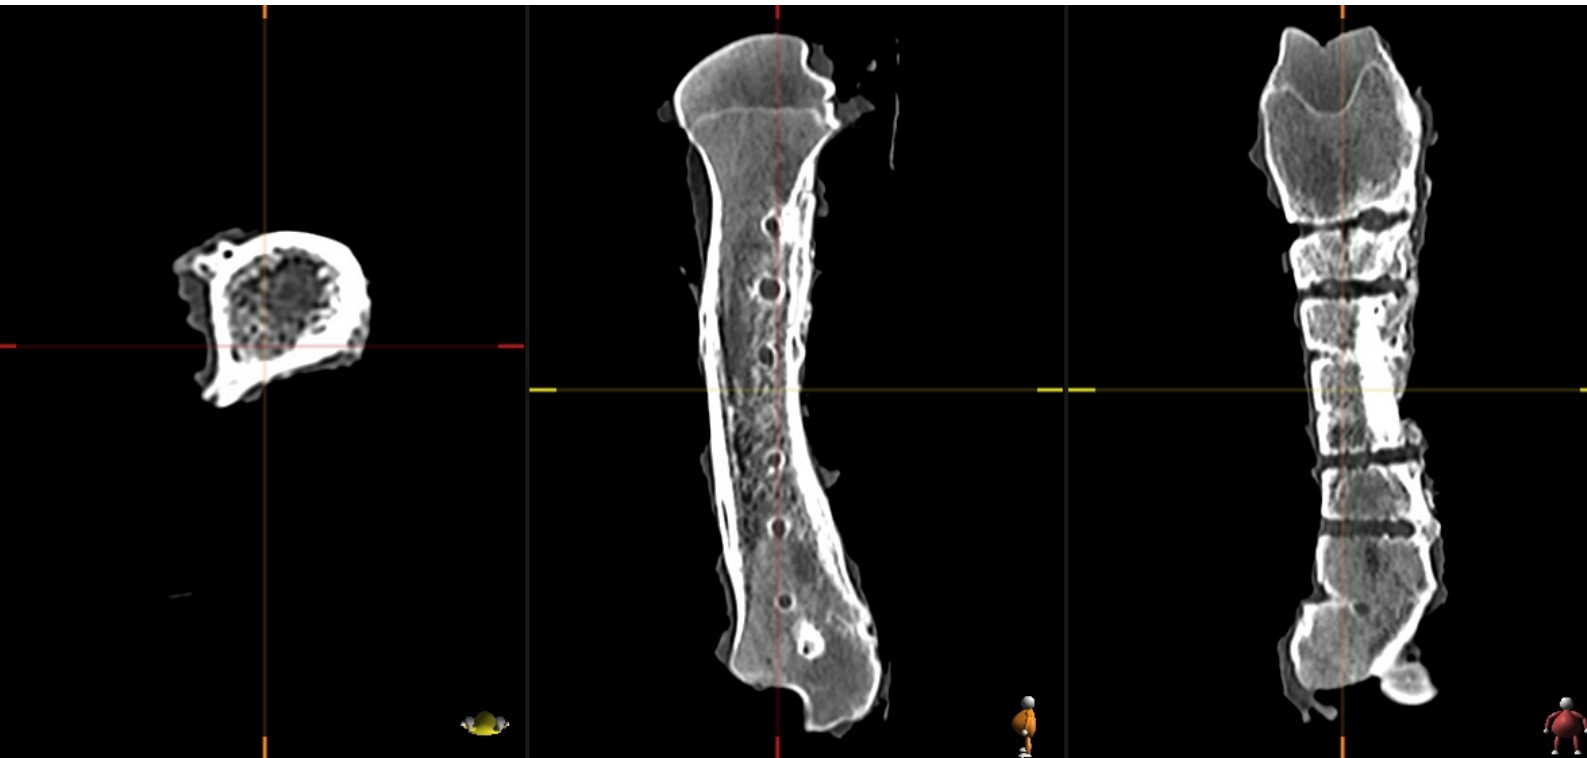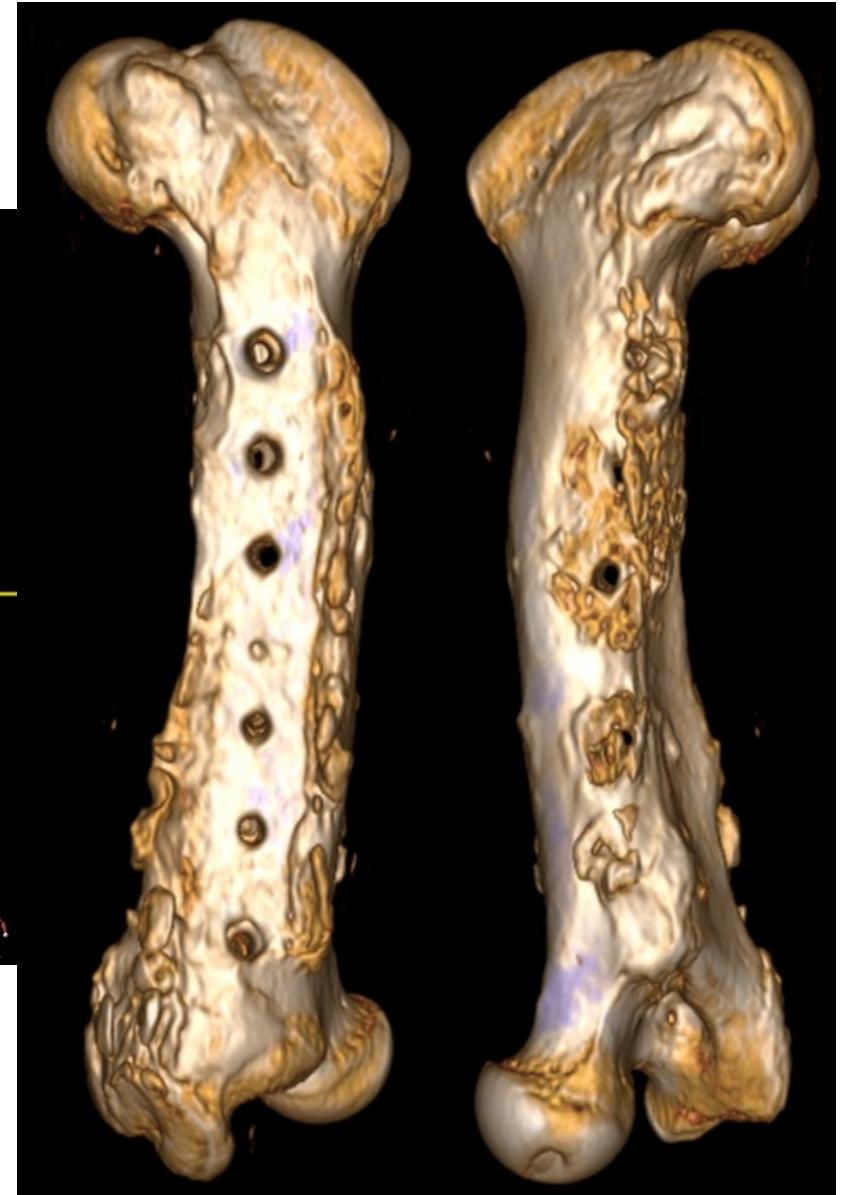

Control Group / No Infection  
Fig No. 7

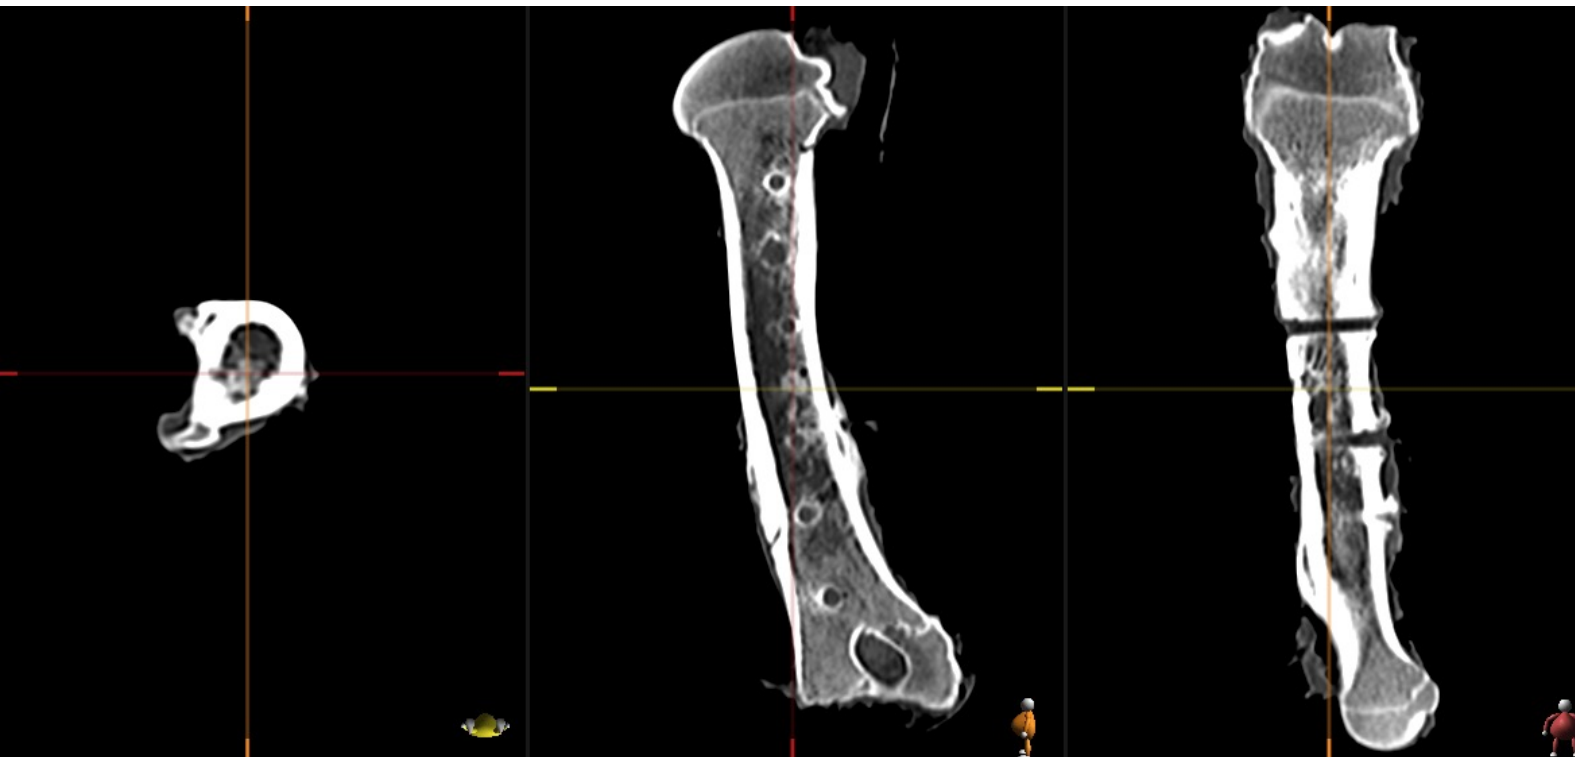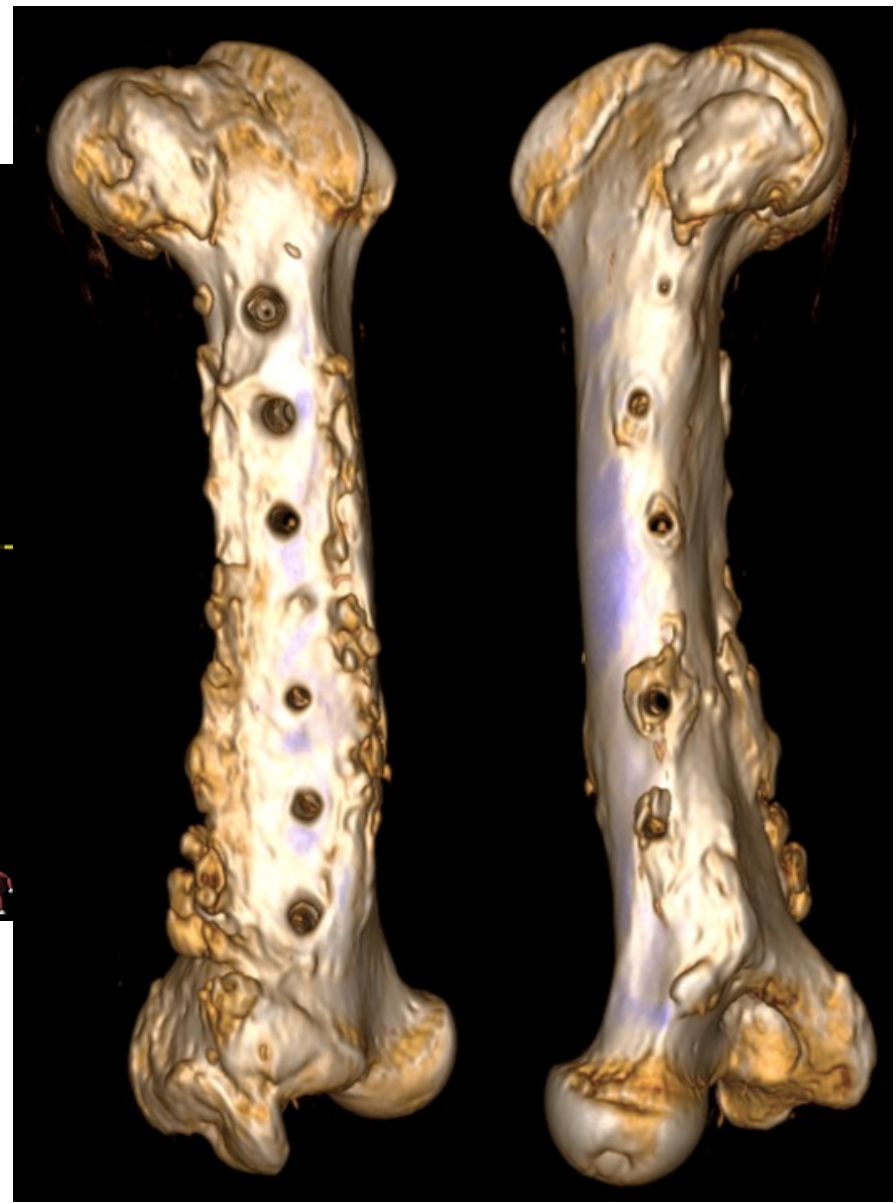

Control Group / No Infection  
Fig No. 8

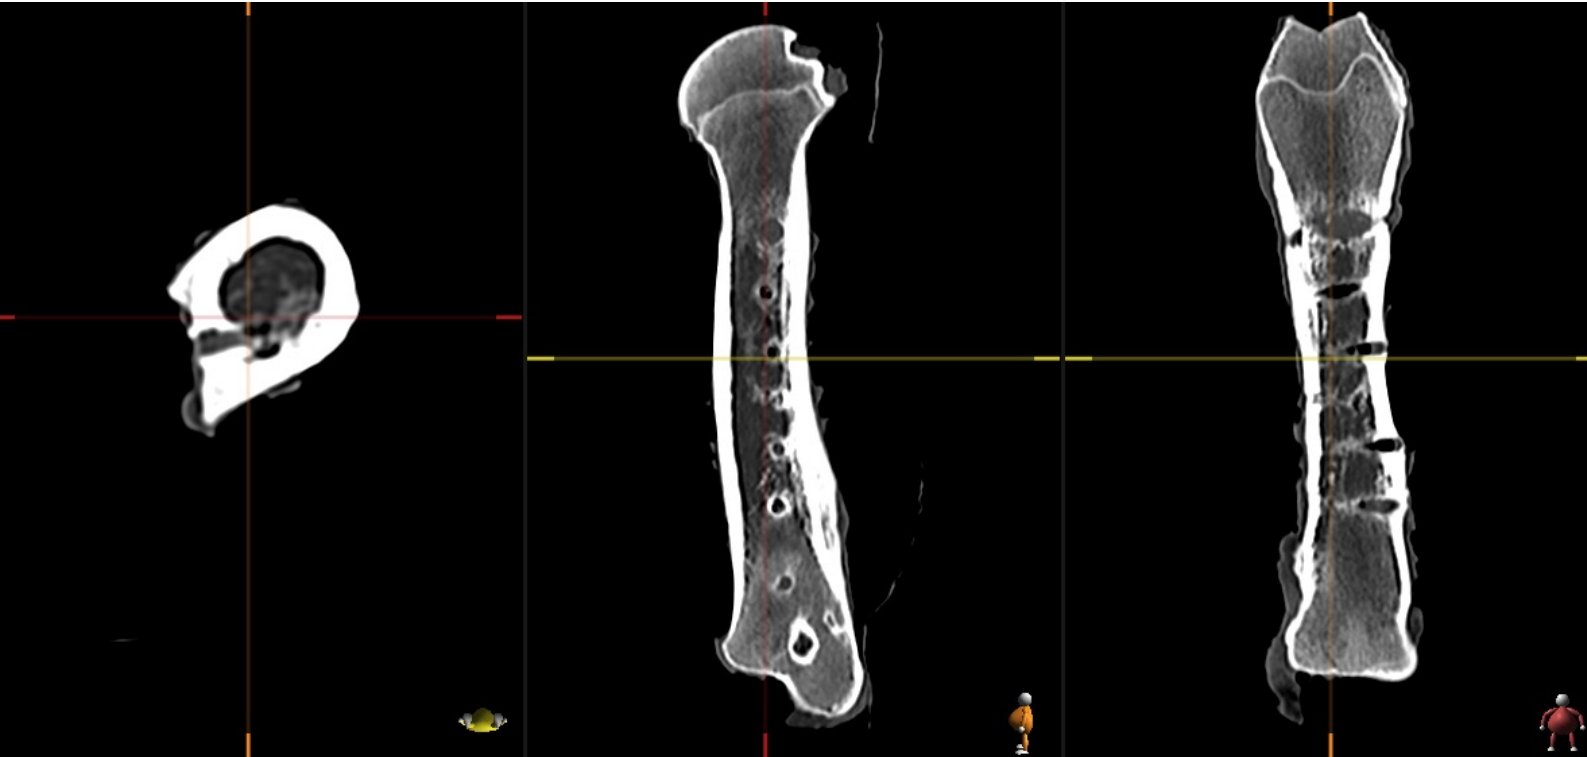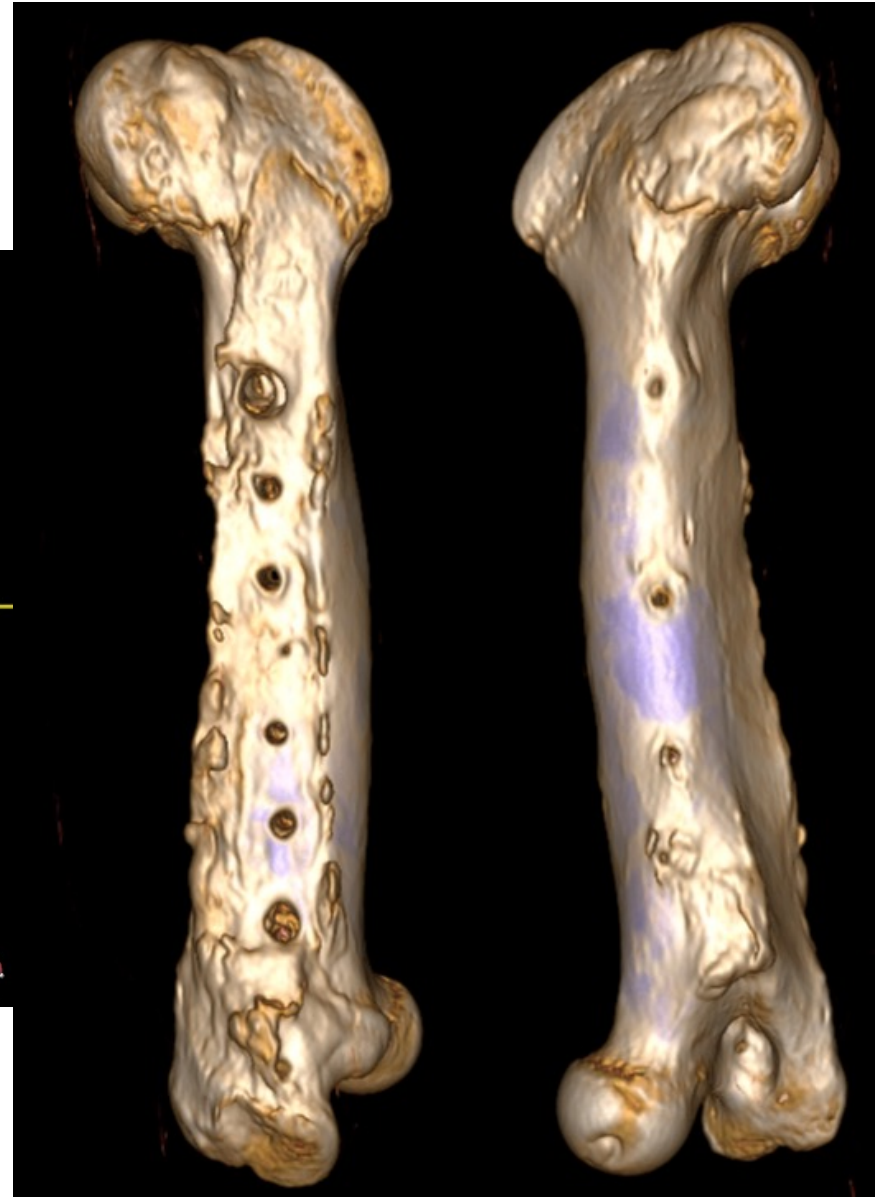



Control Group / No Infection  
Fig No. 9

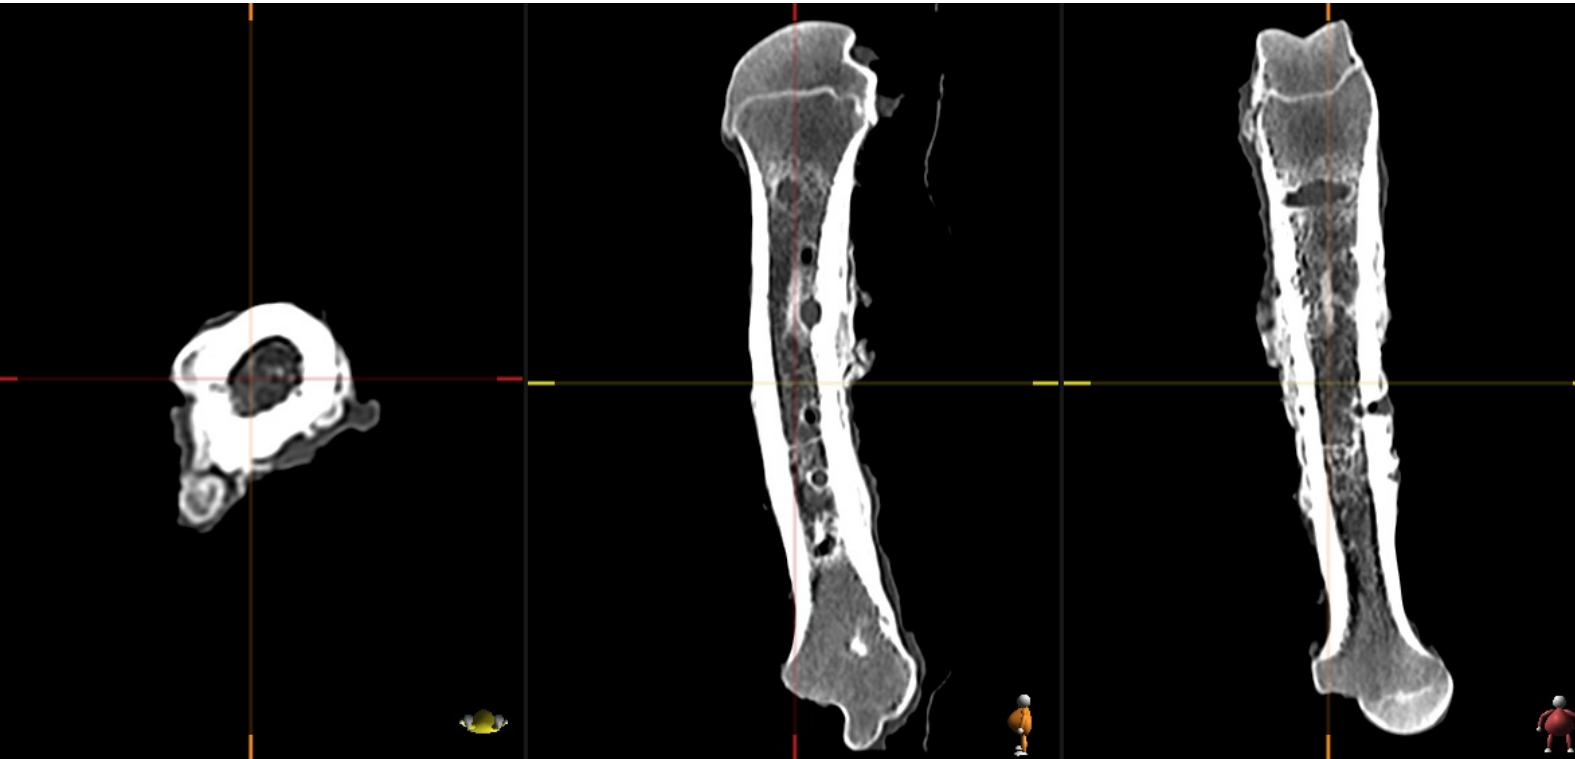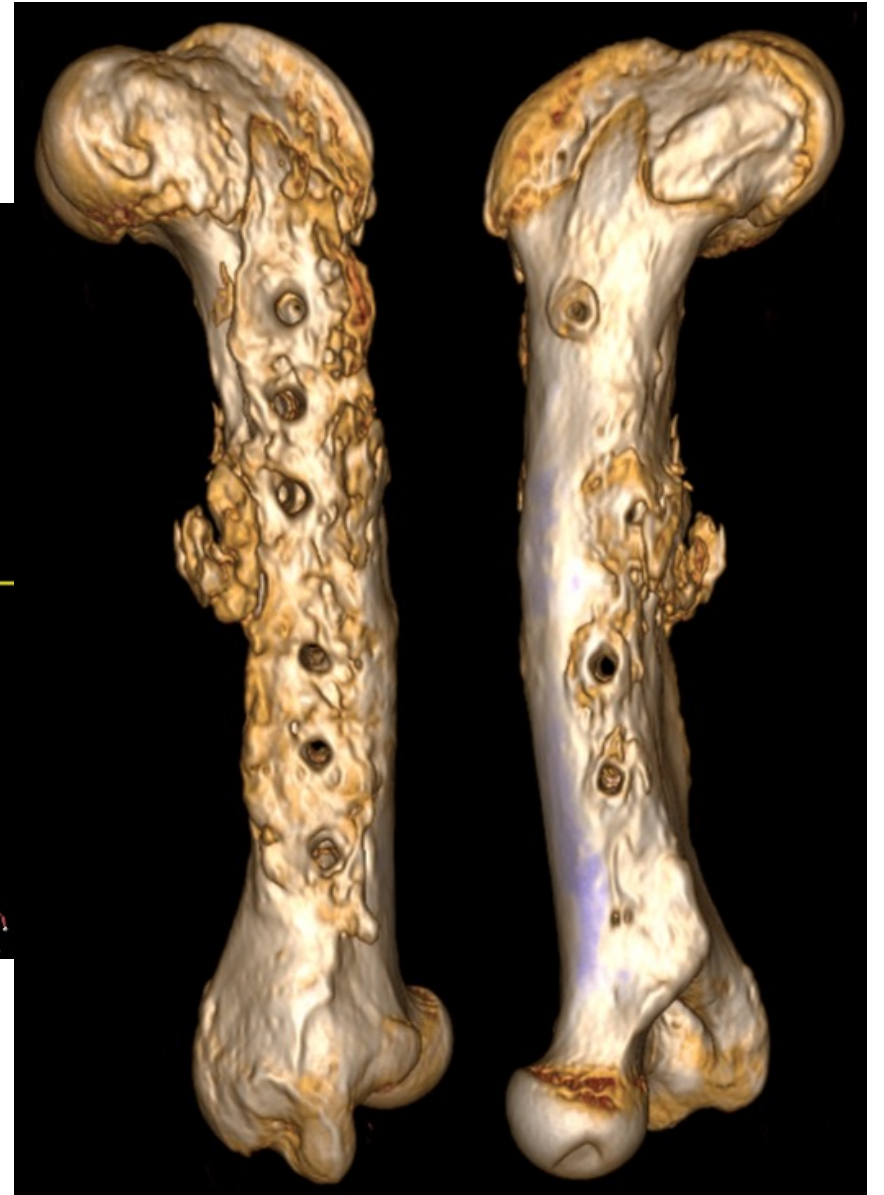

Control Group / No Infection  
Fig No. 10

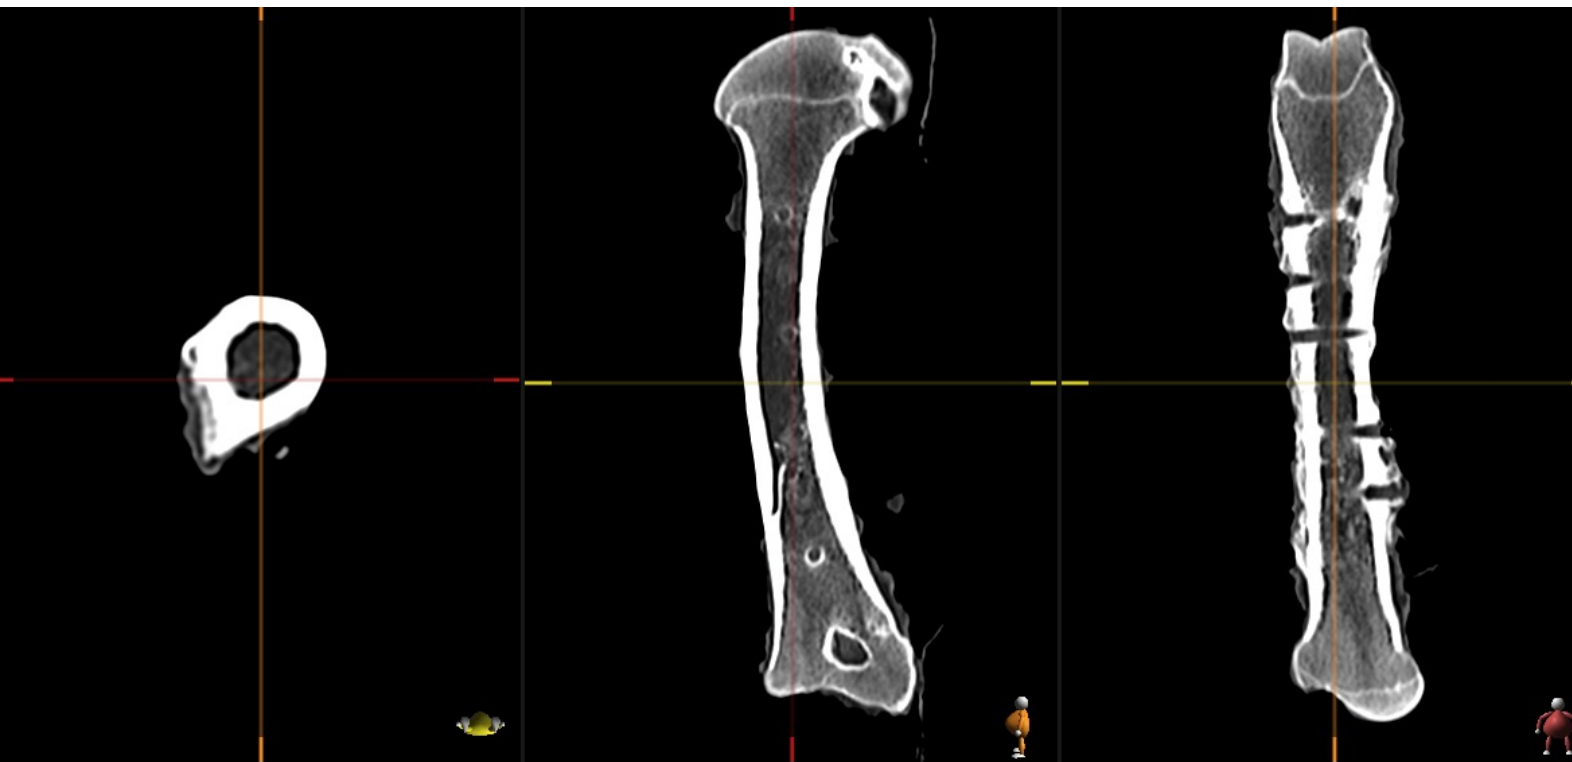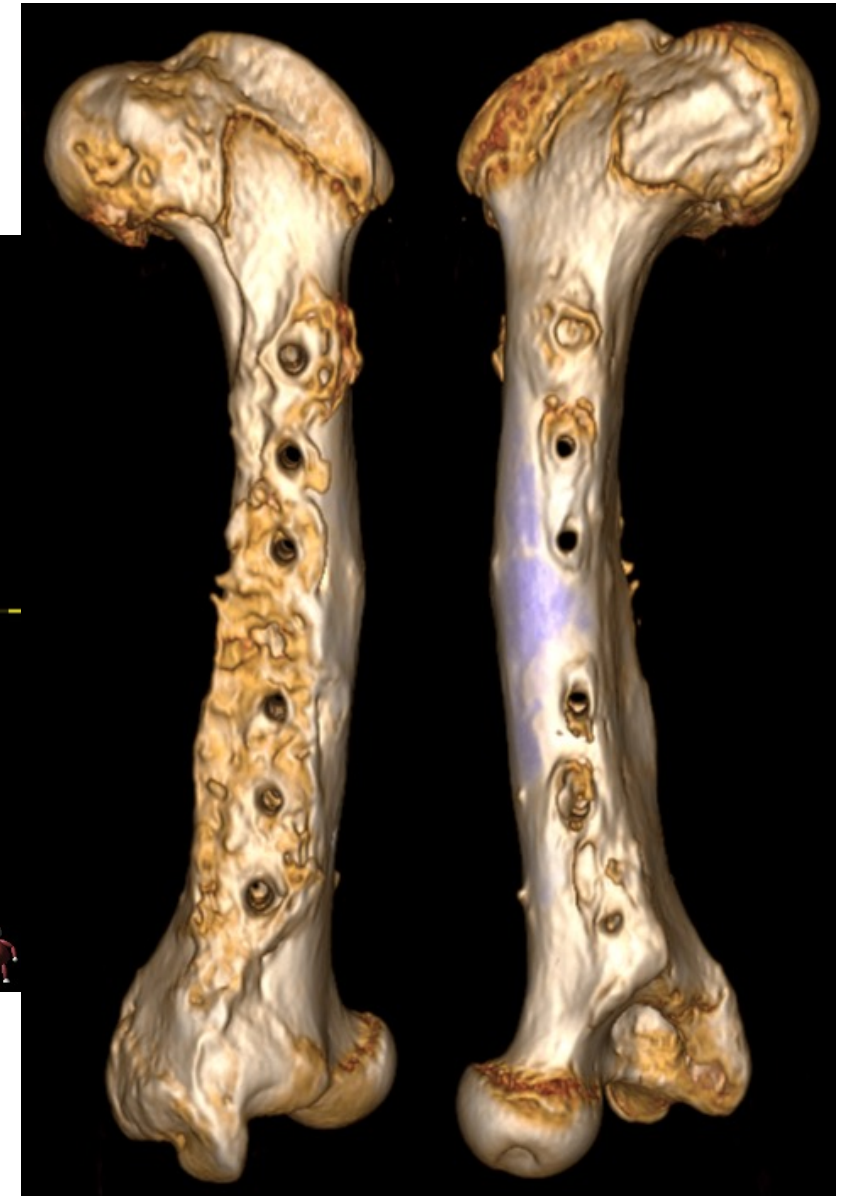

Control Group / No Infection  
Fig No. 11

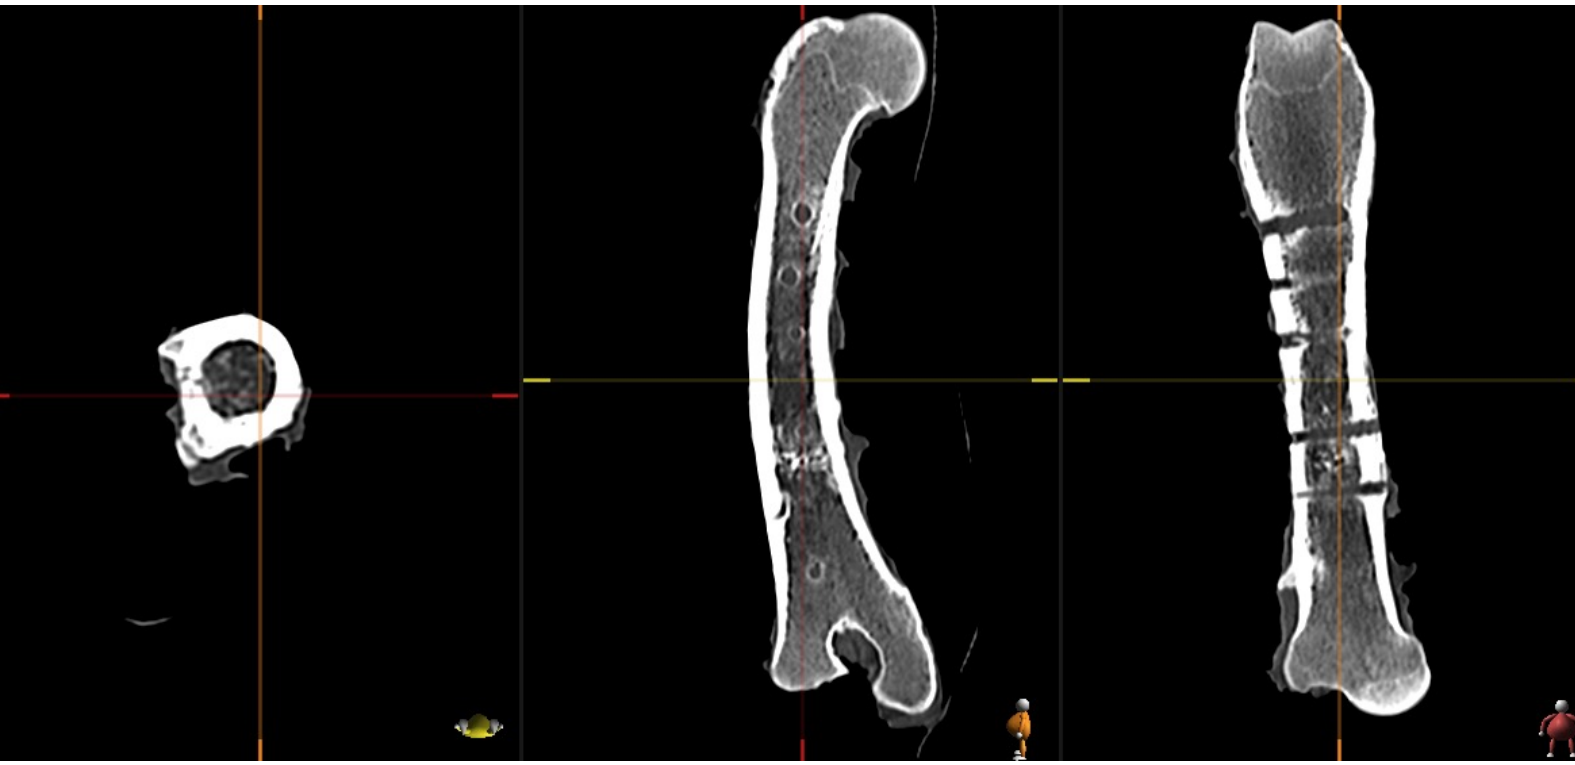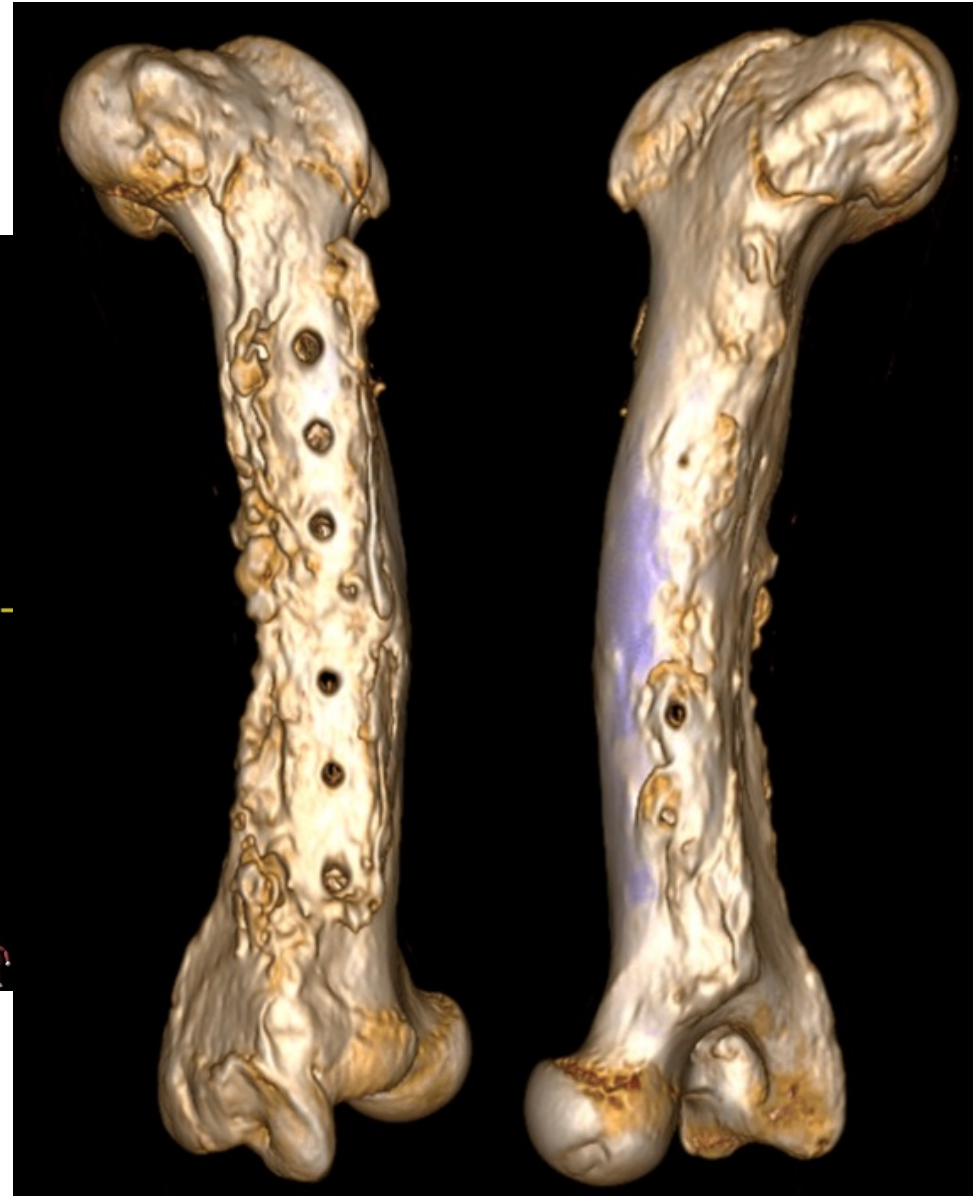

Control Group / No Infection  
Fig No. 12

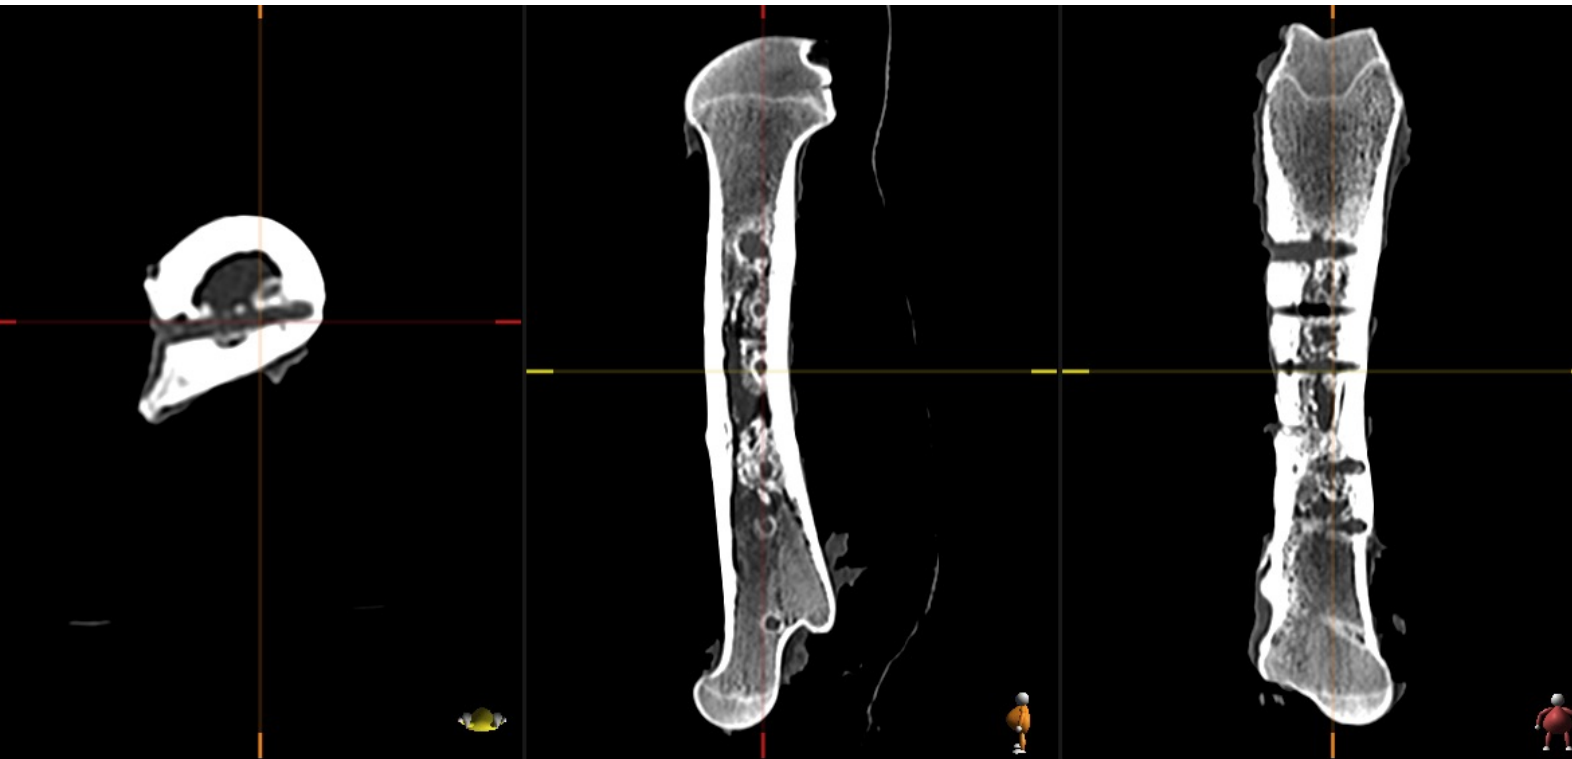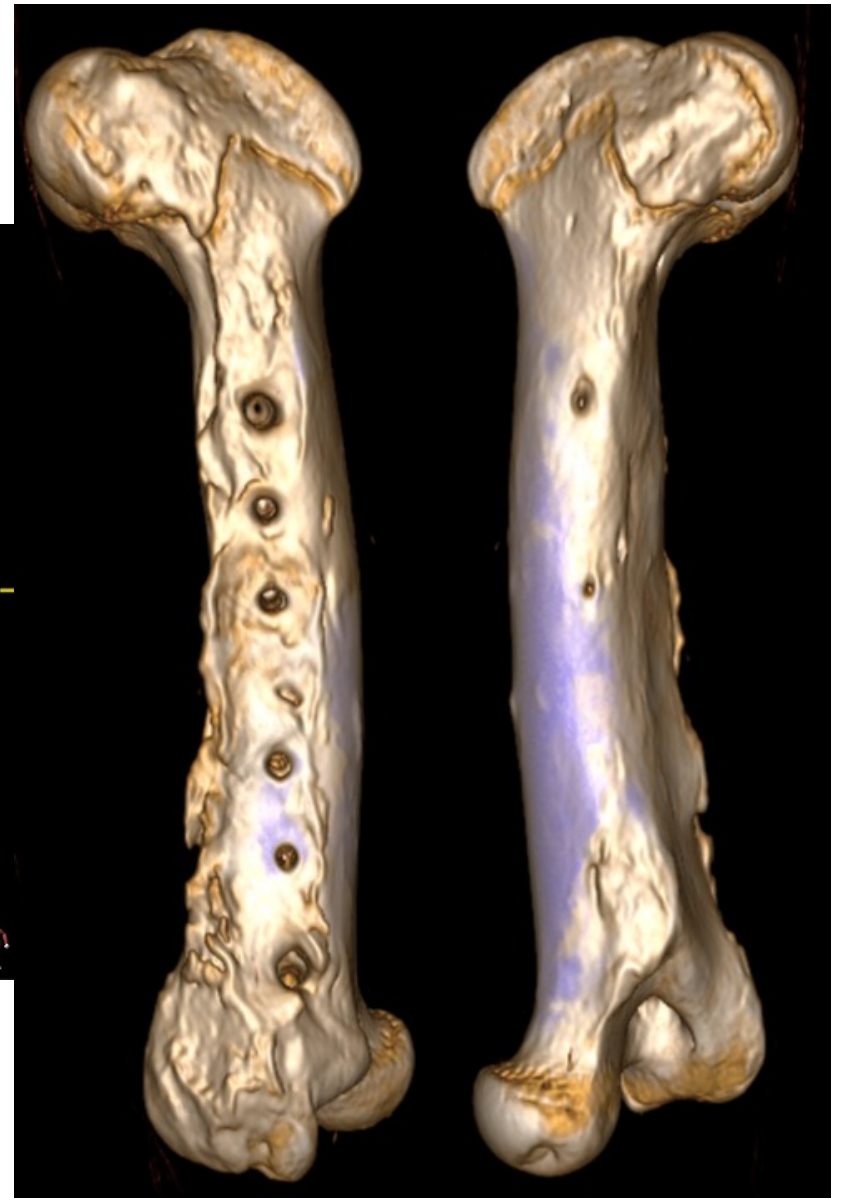



Control Group / No Infection  
Fig No. 13

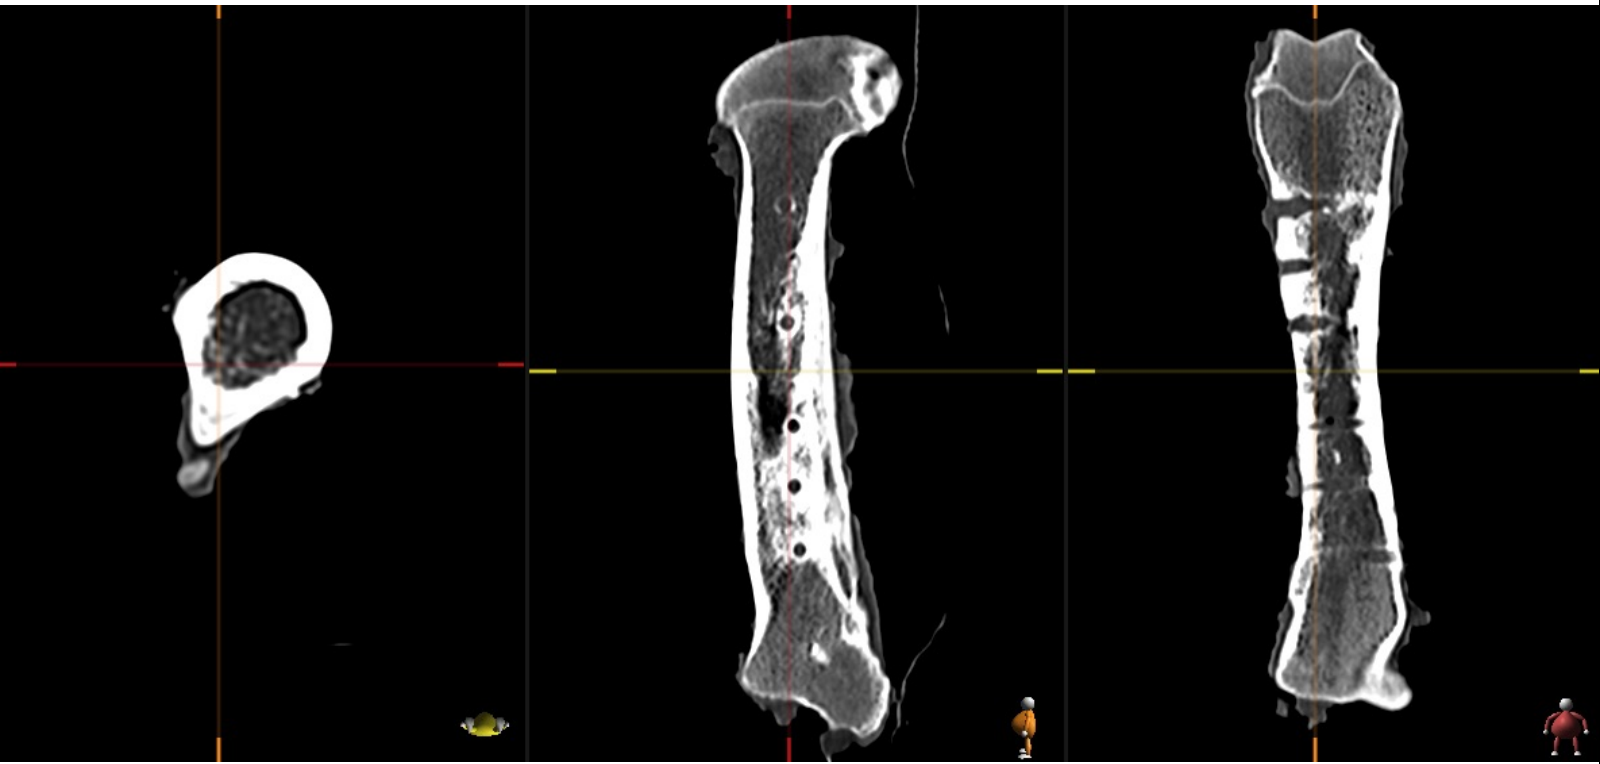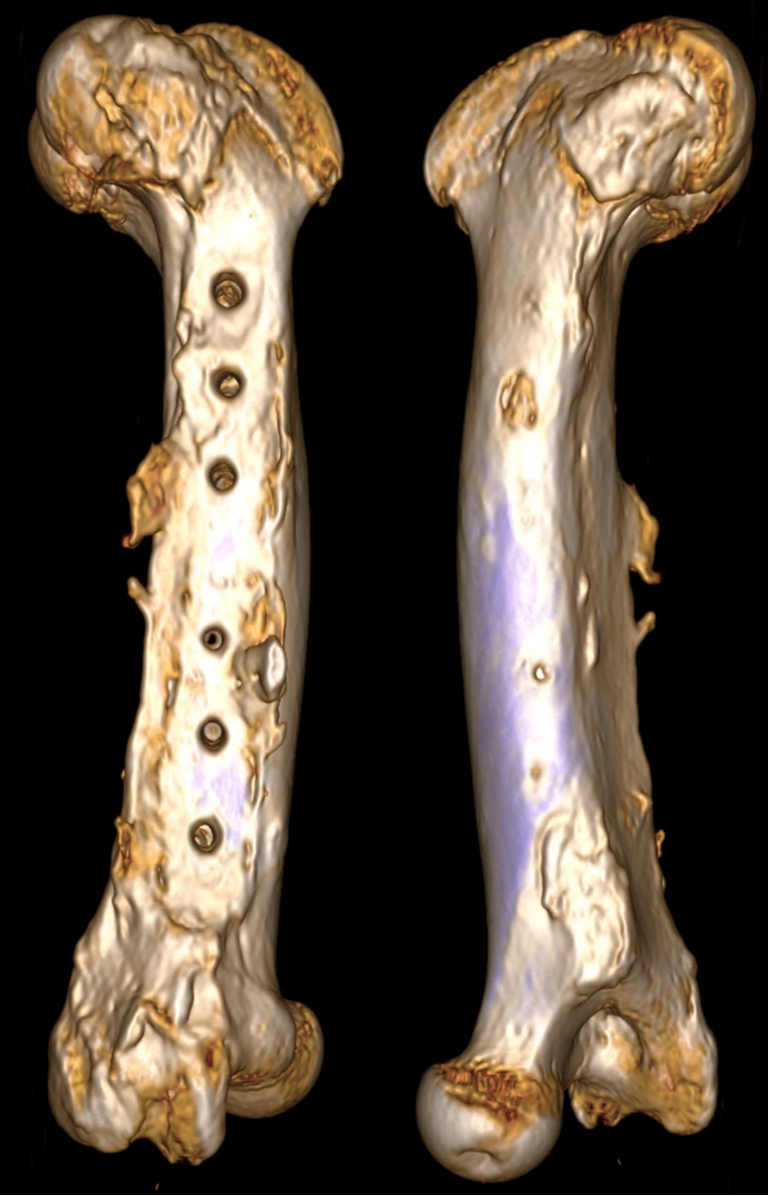



Control Group / No Infection

Pig No. 14

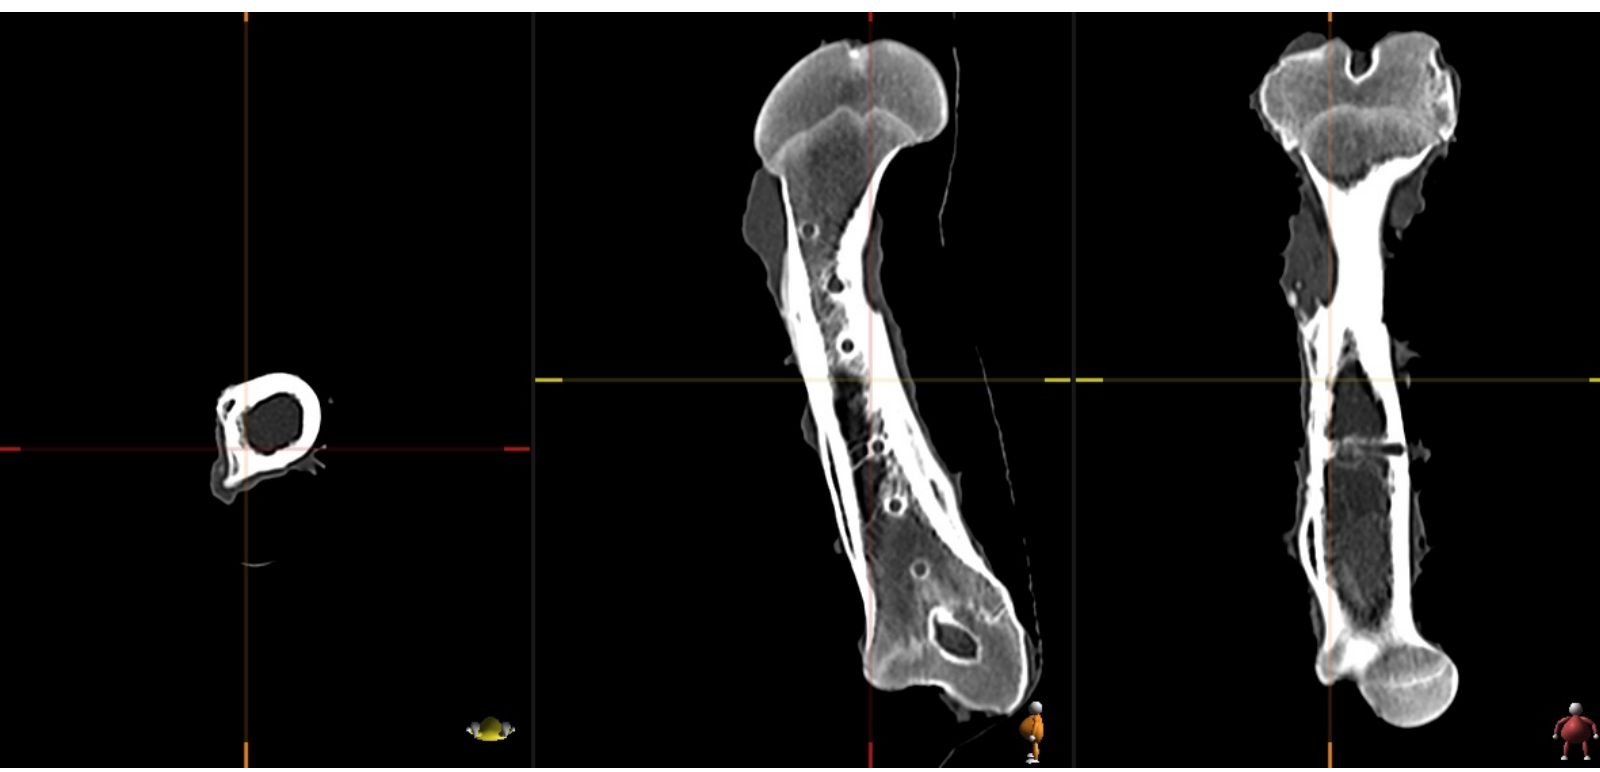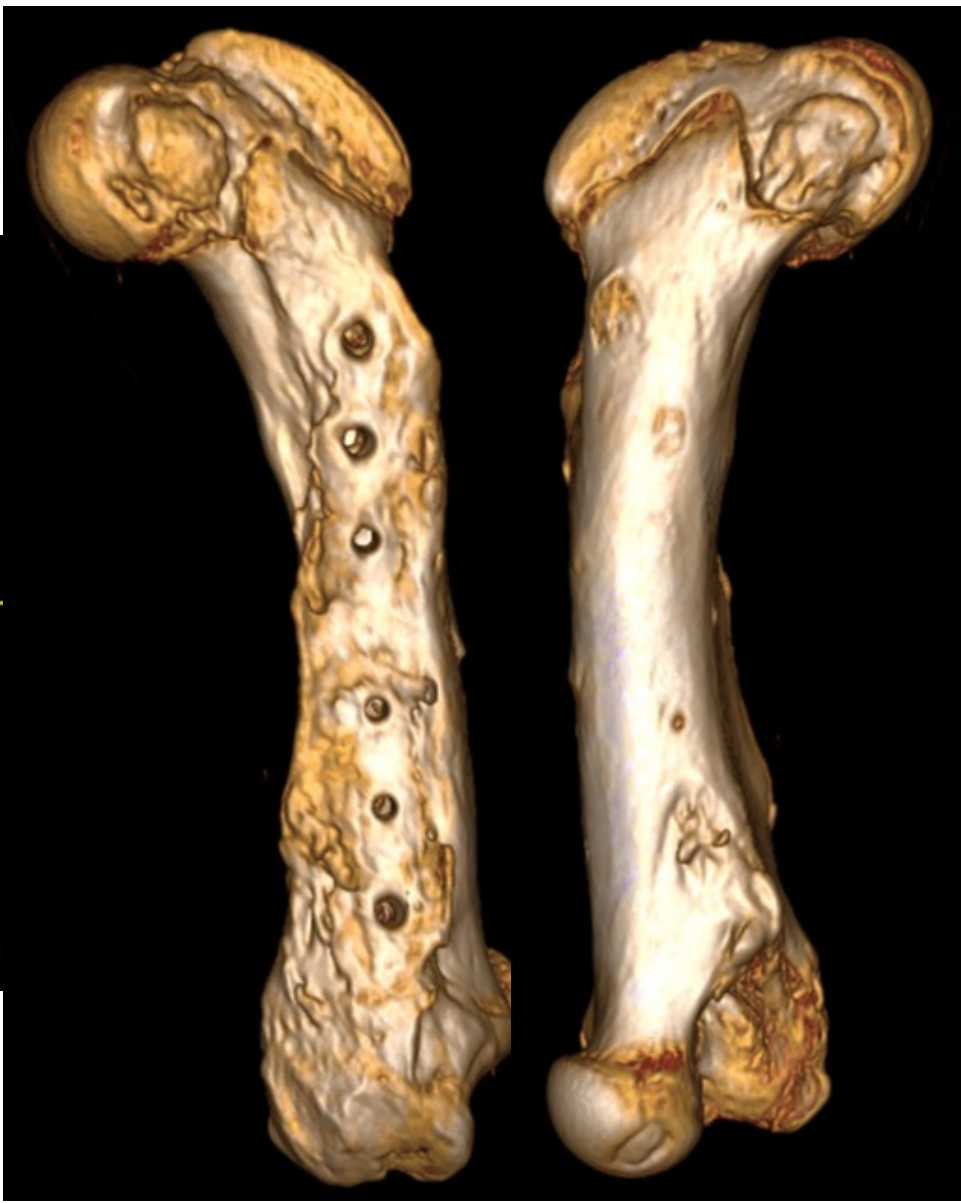

Control Group / No Infection  
Fig No. 15

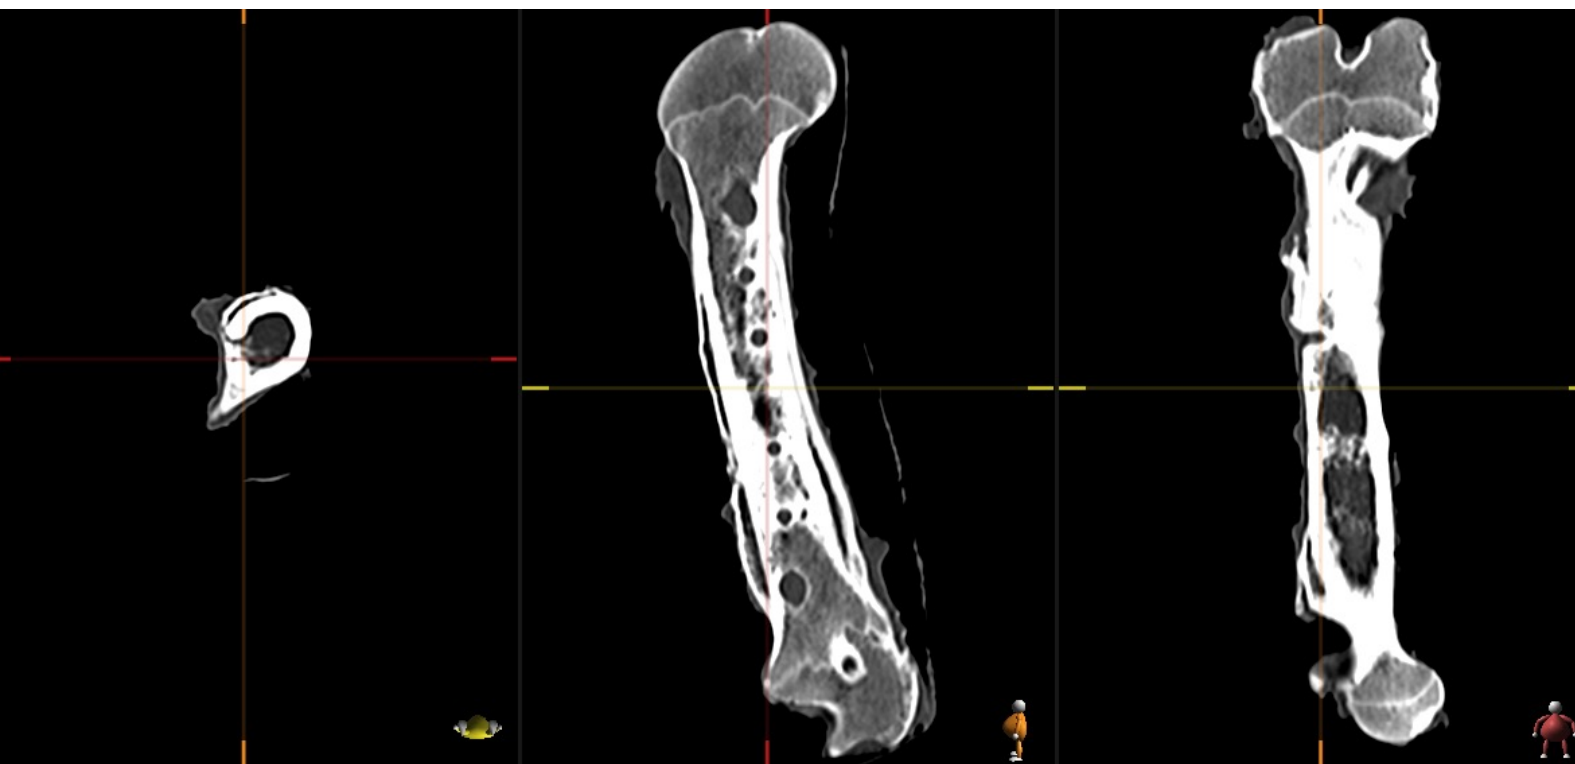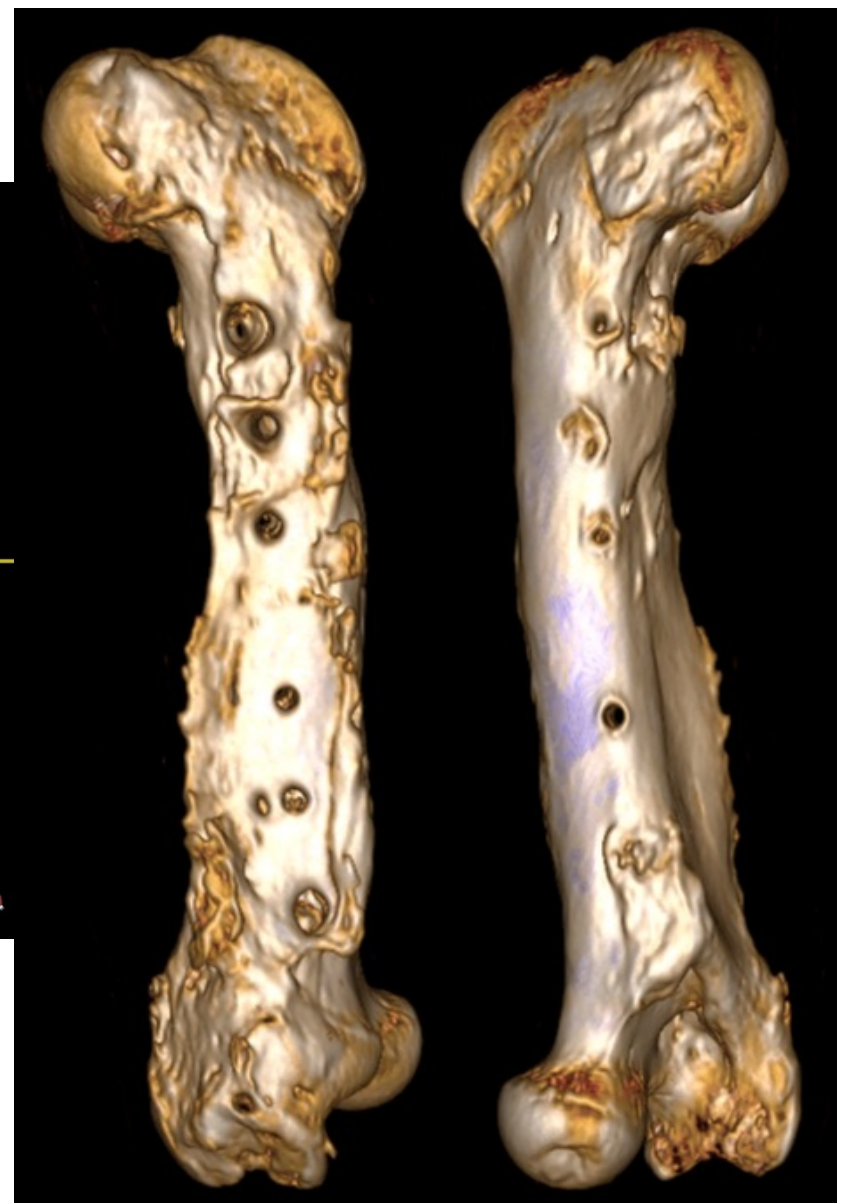

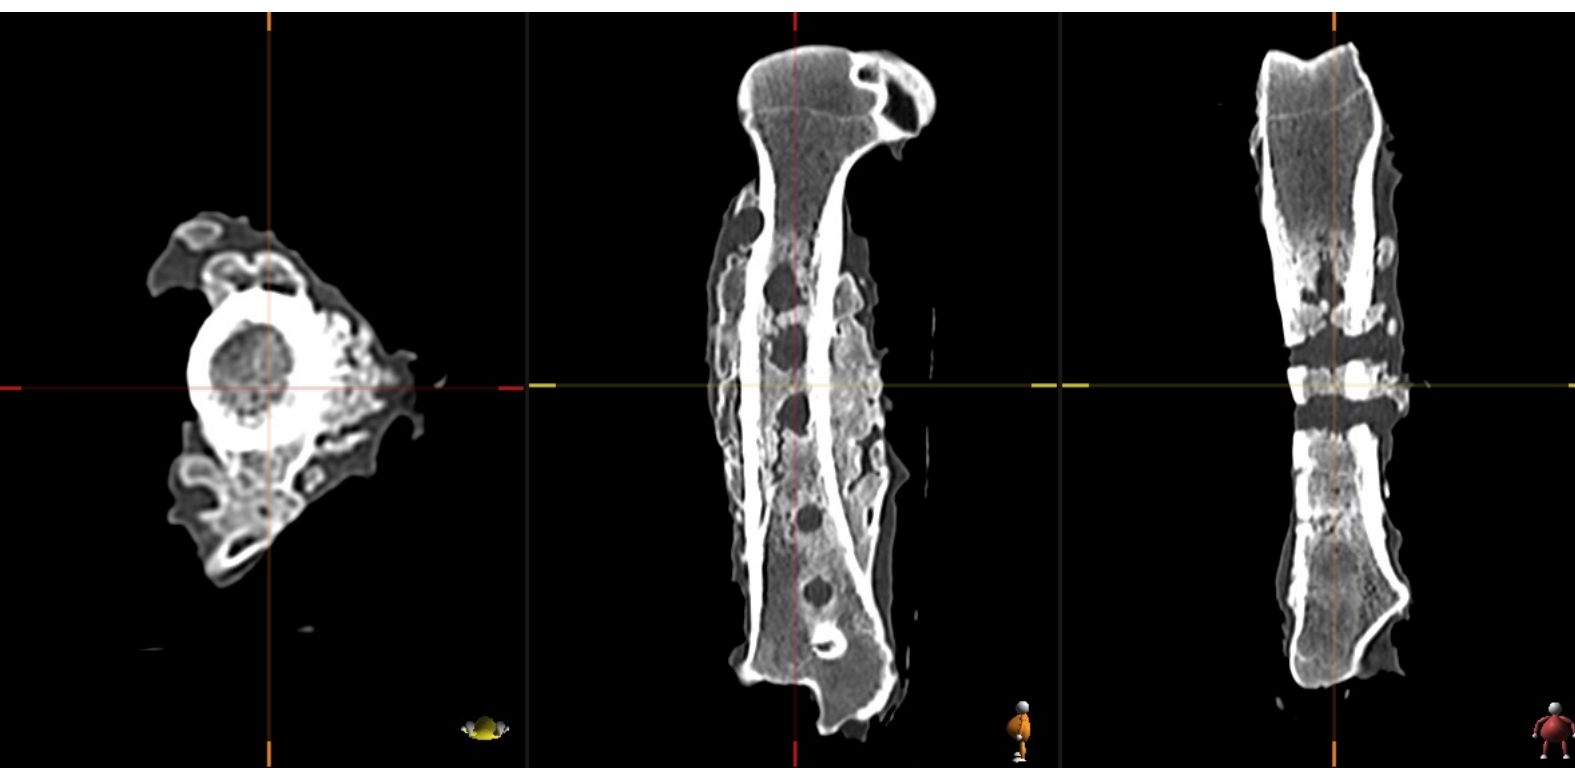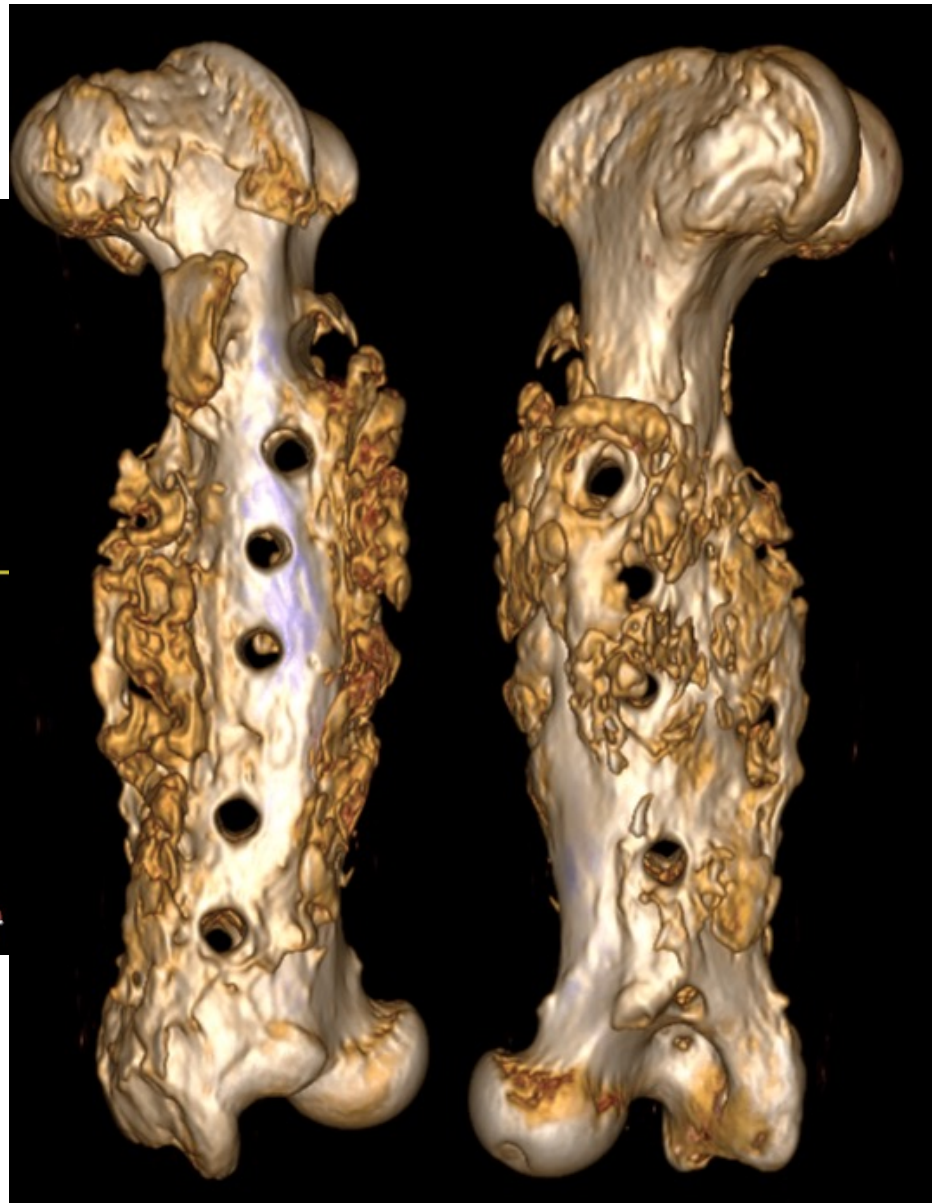



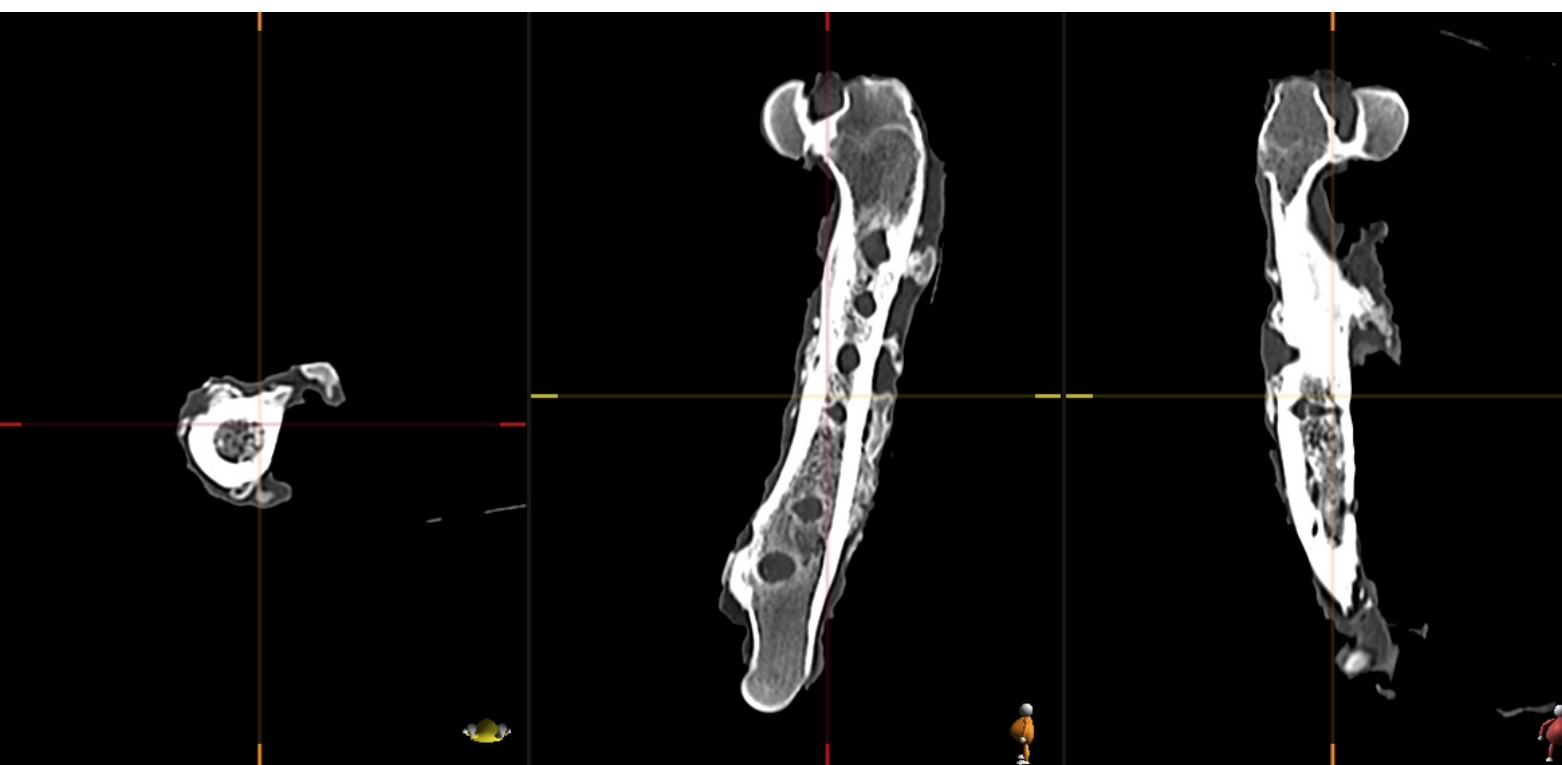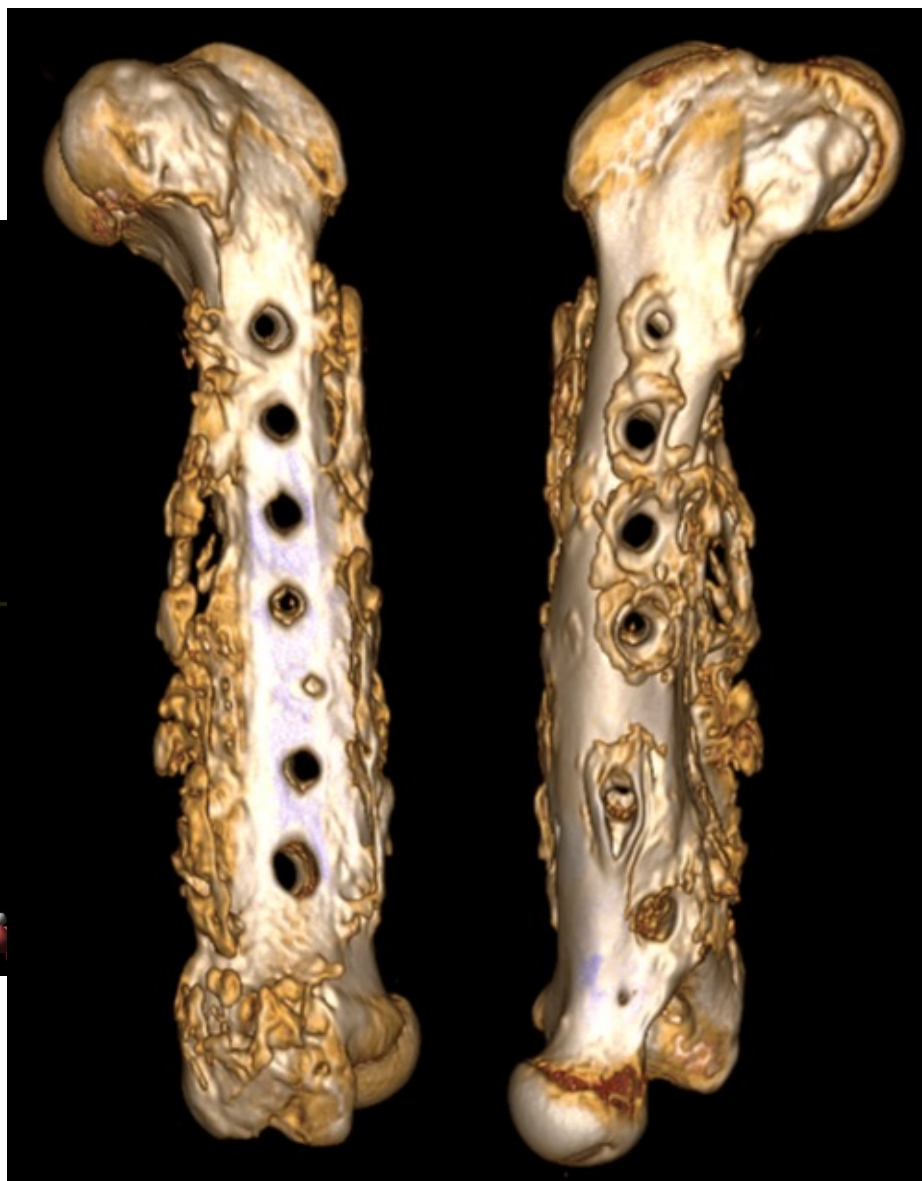



# Infection Group / Infection and Uncoated Plate

Pig No. 3

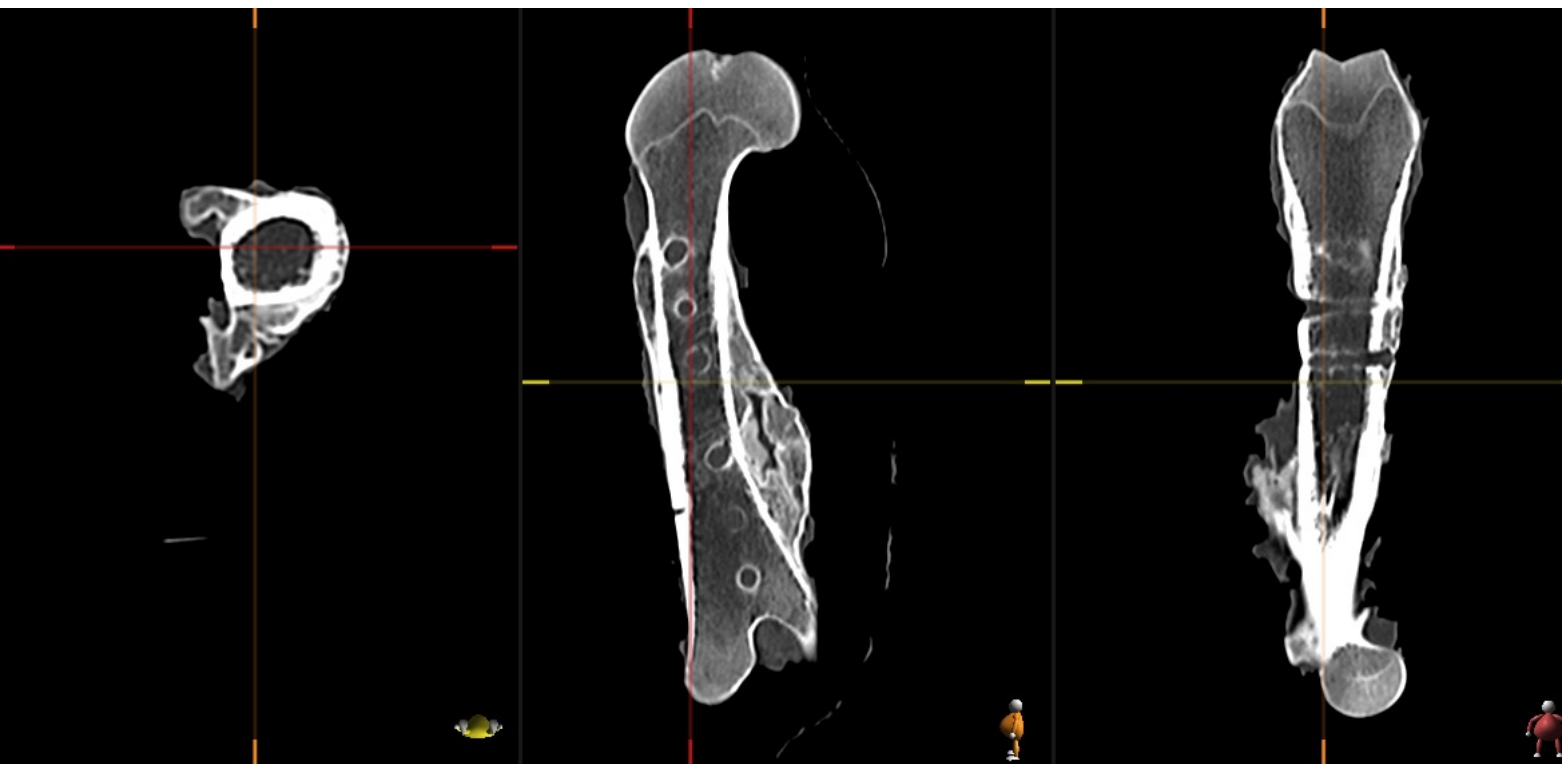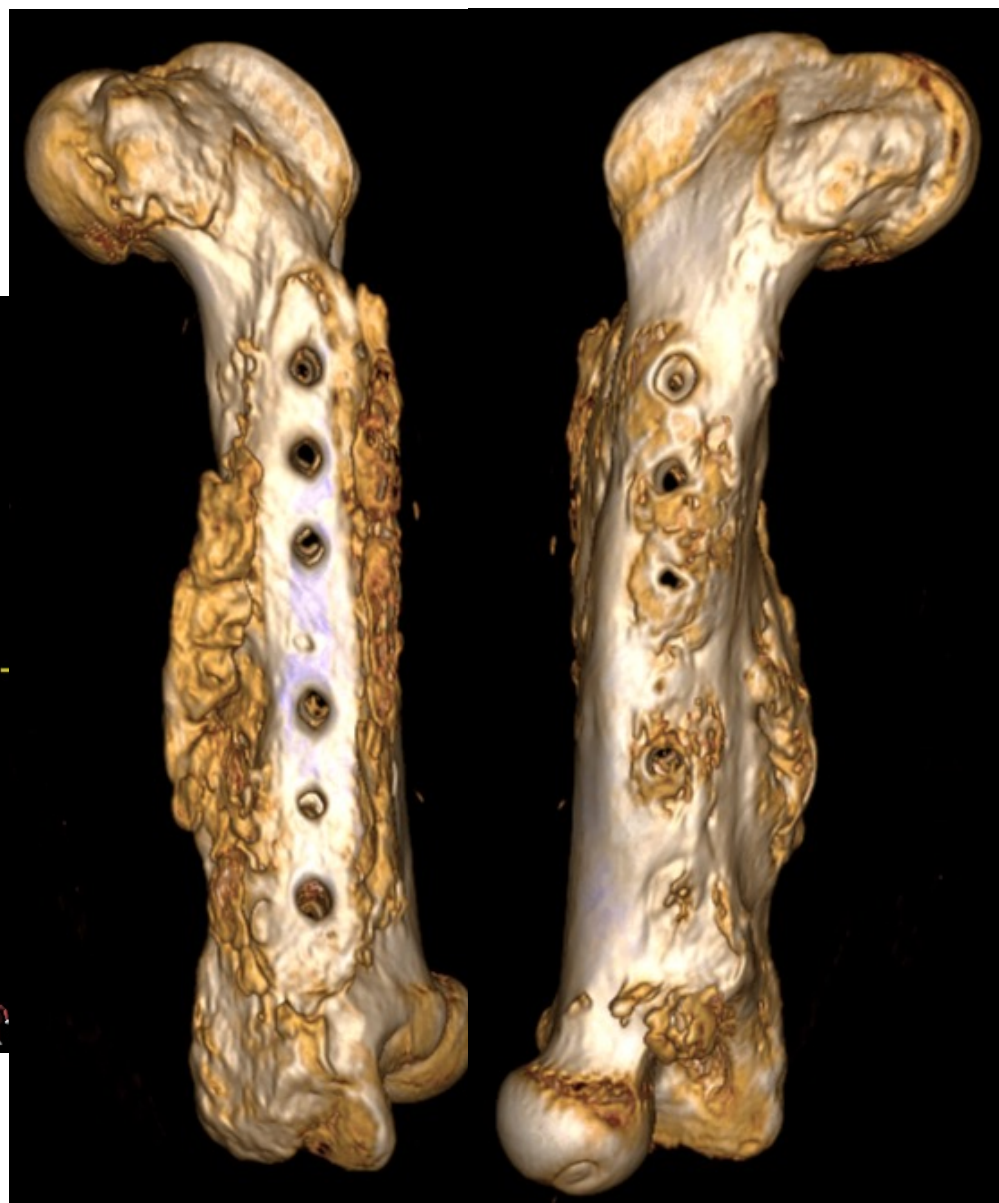

# Infection Group / Infection and Uncoated Plate

Pig No. 4

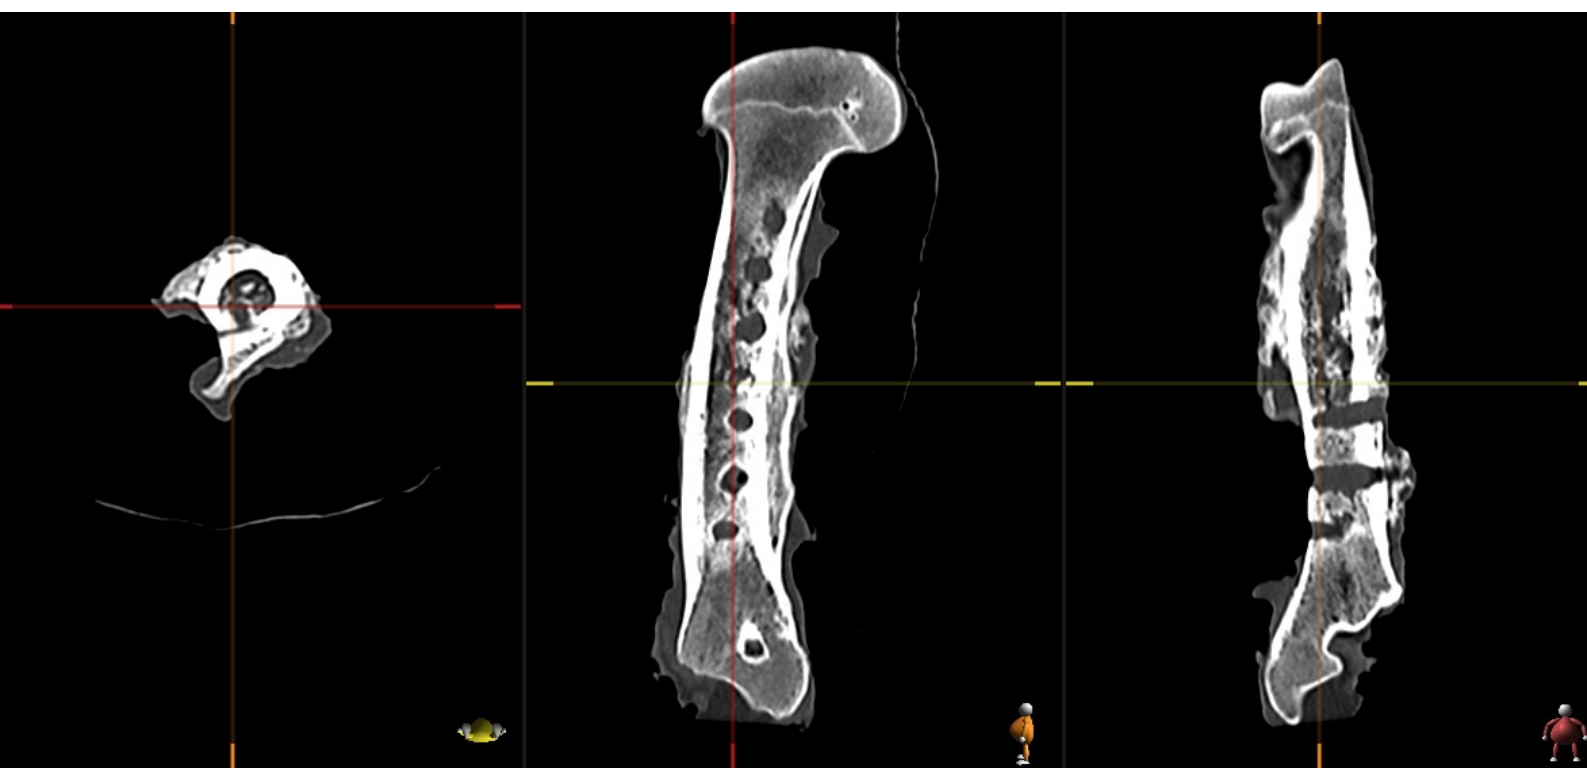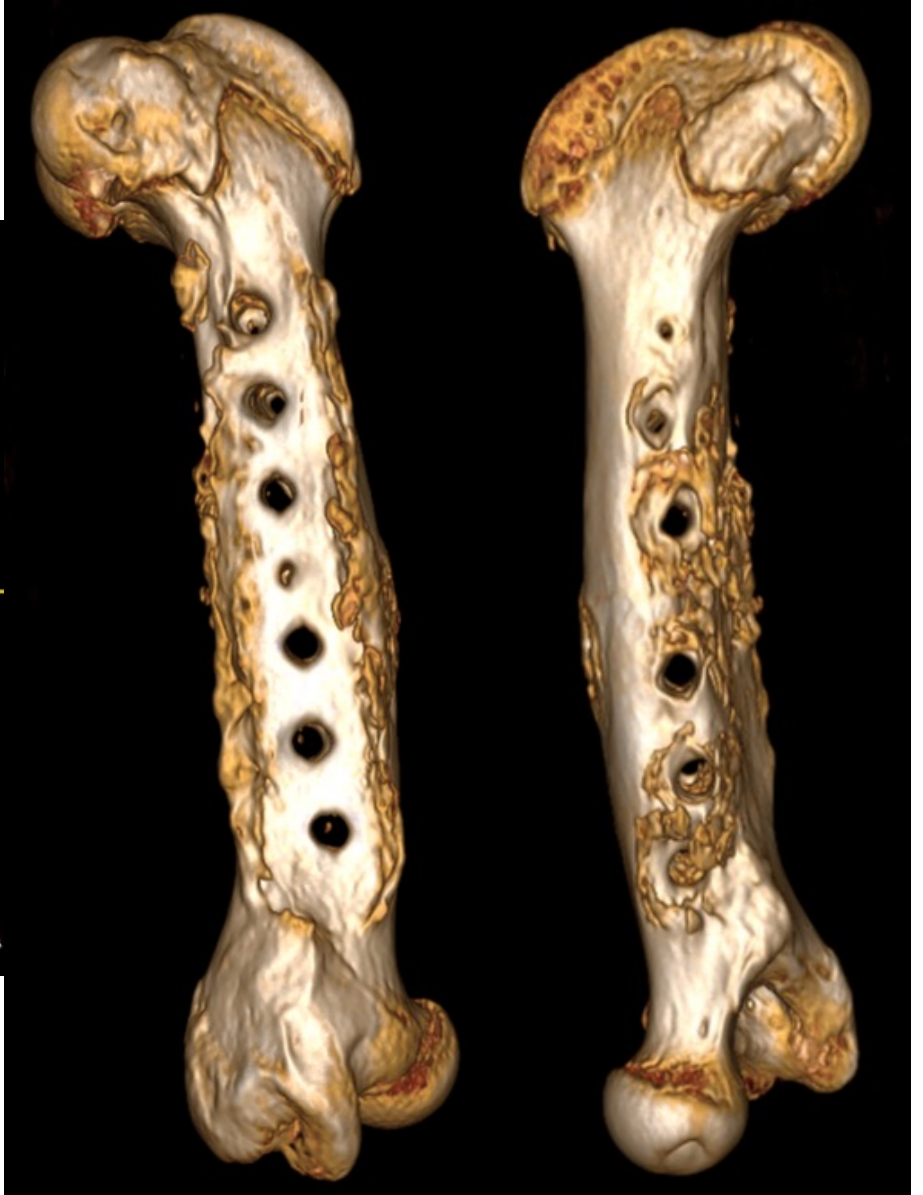

# Infection Group / Infection and Uncoated Plate

Pig No. 5

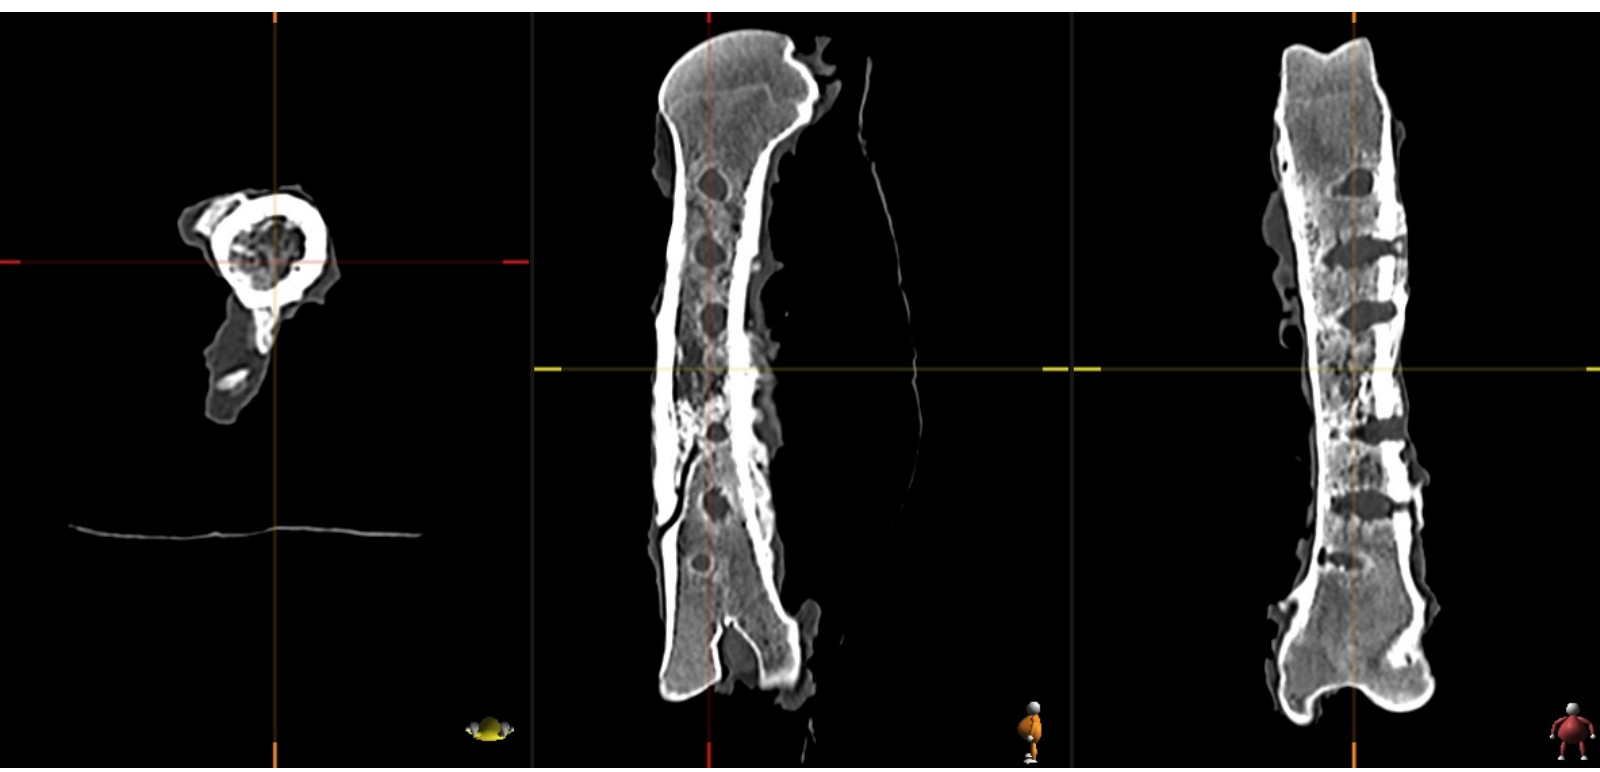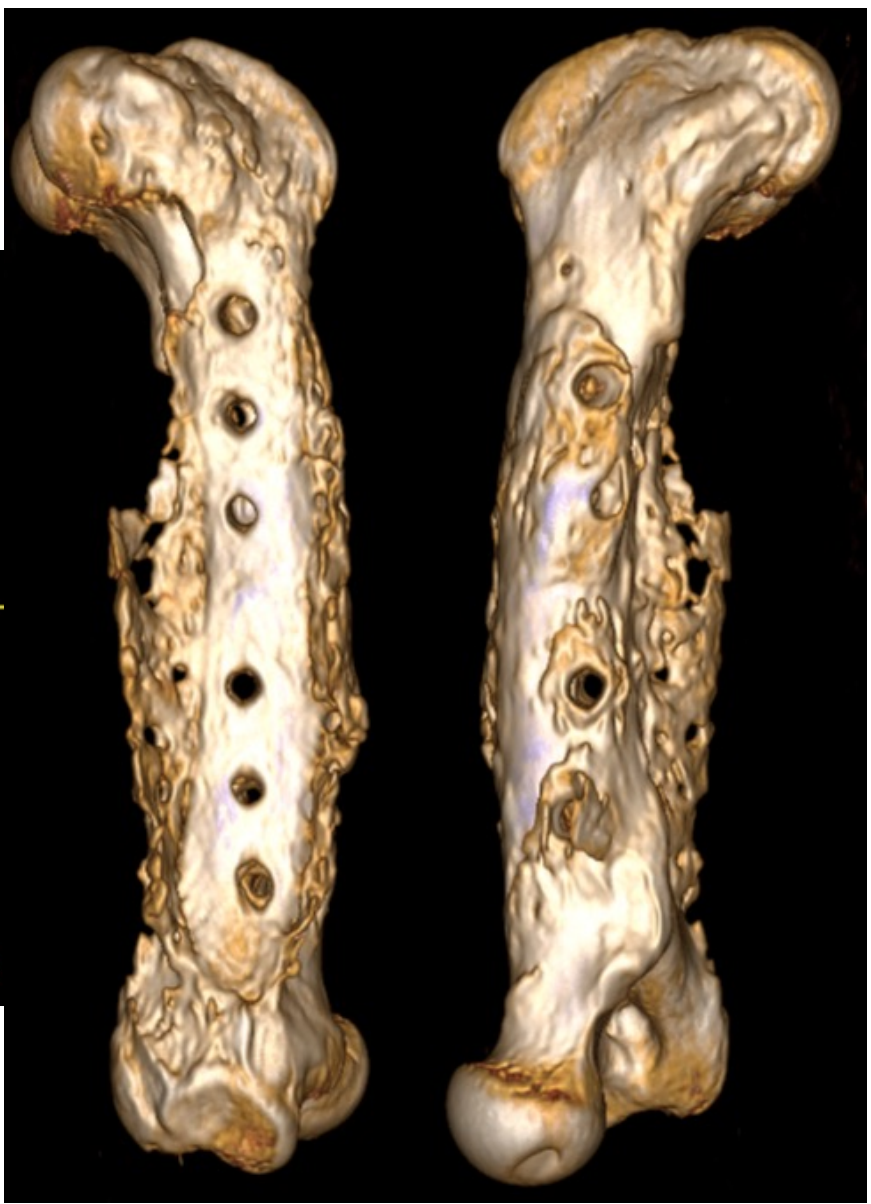



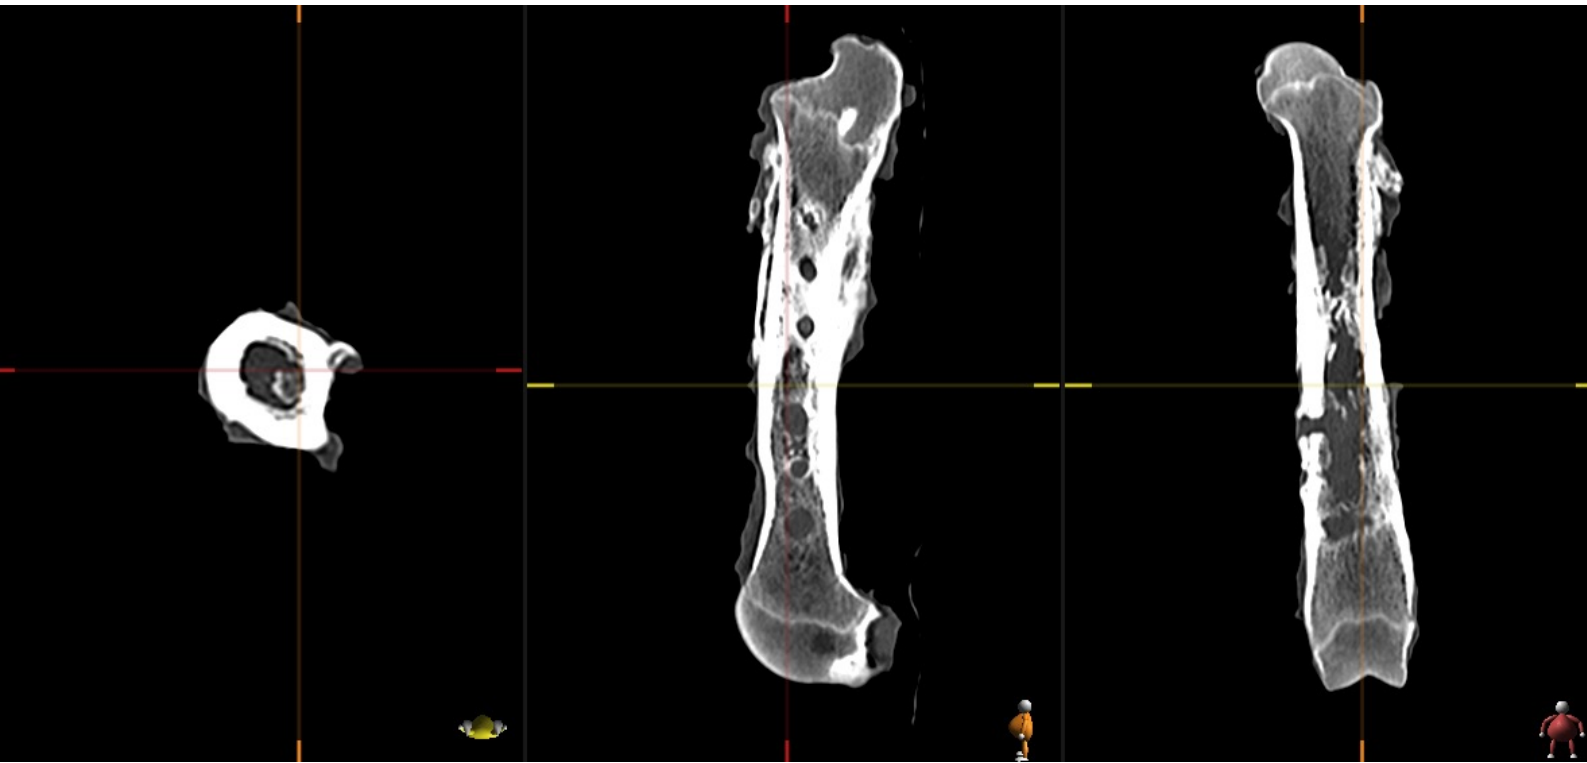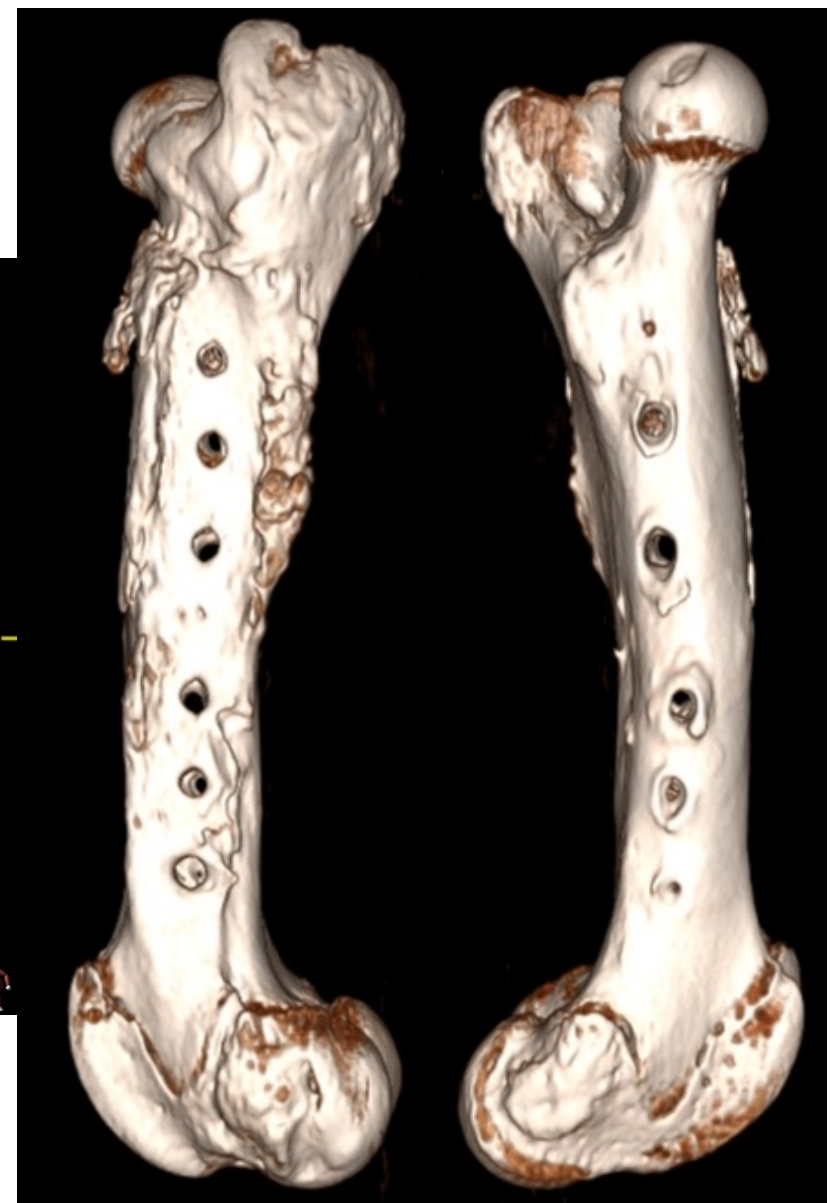



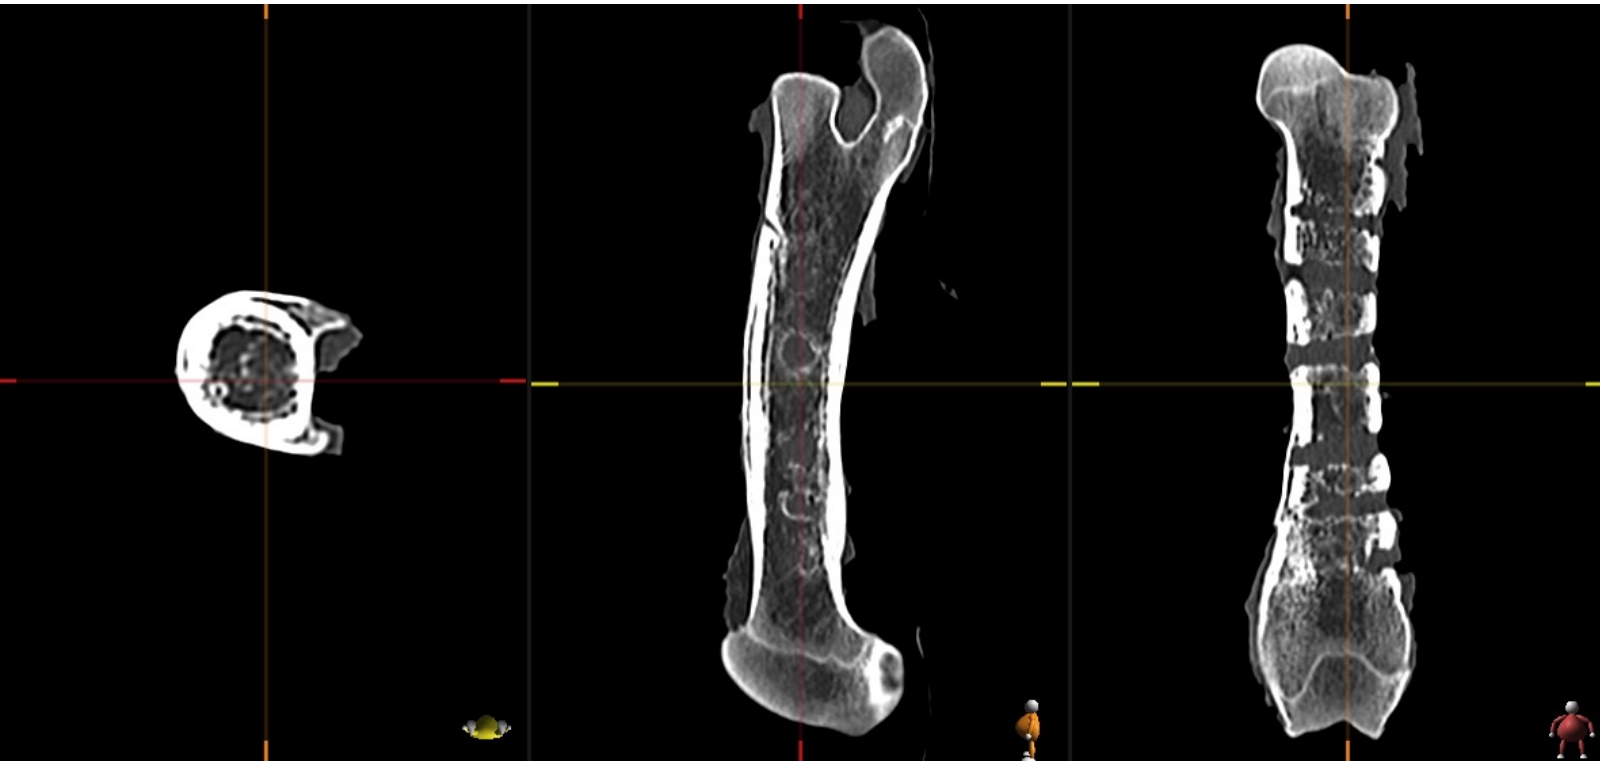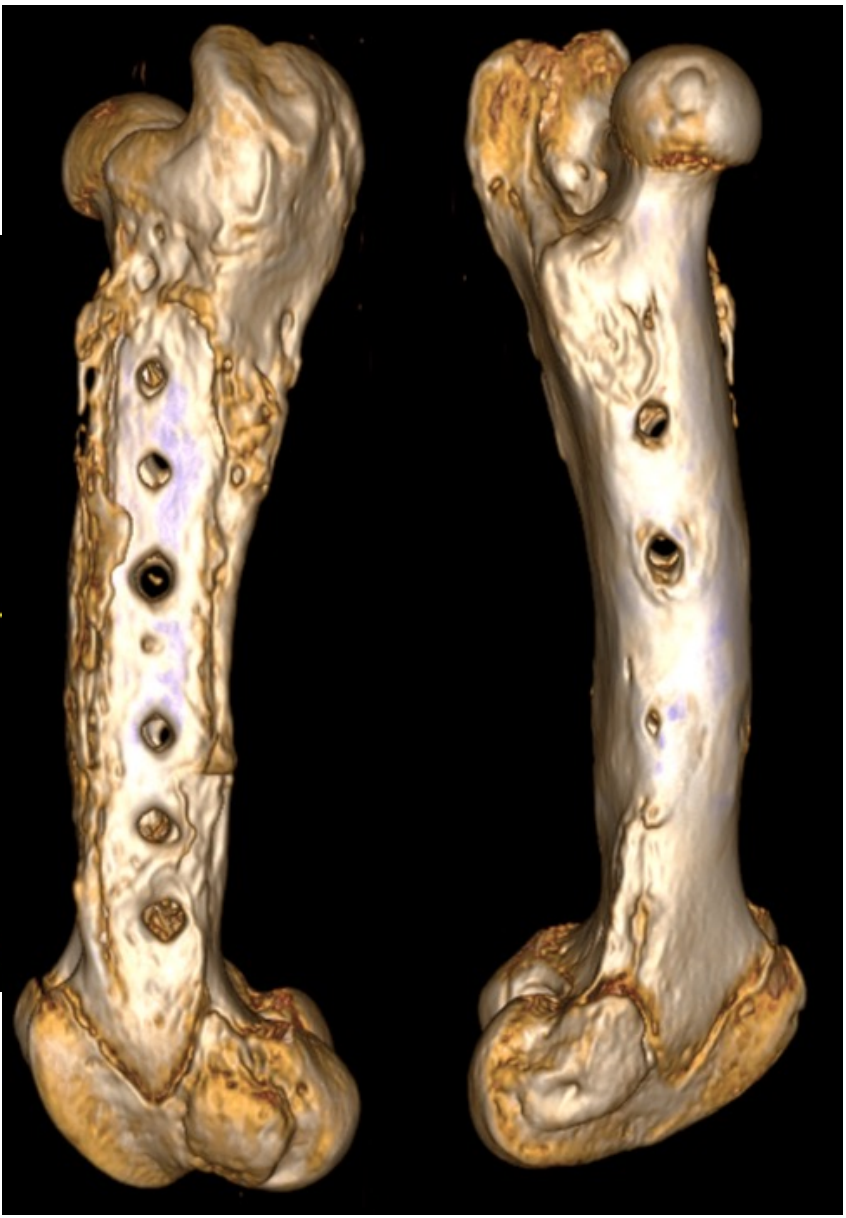

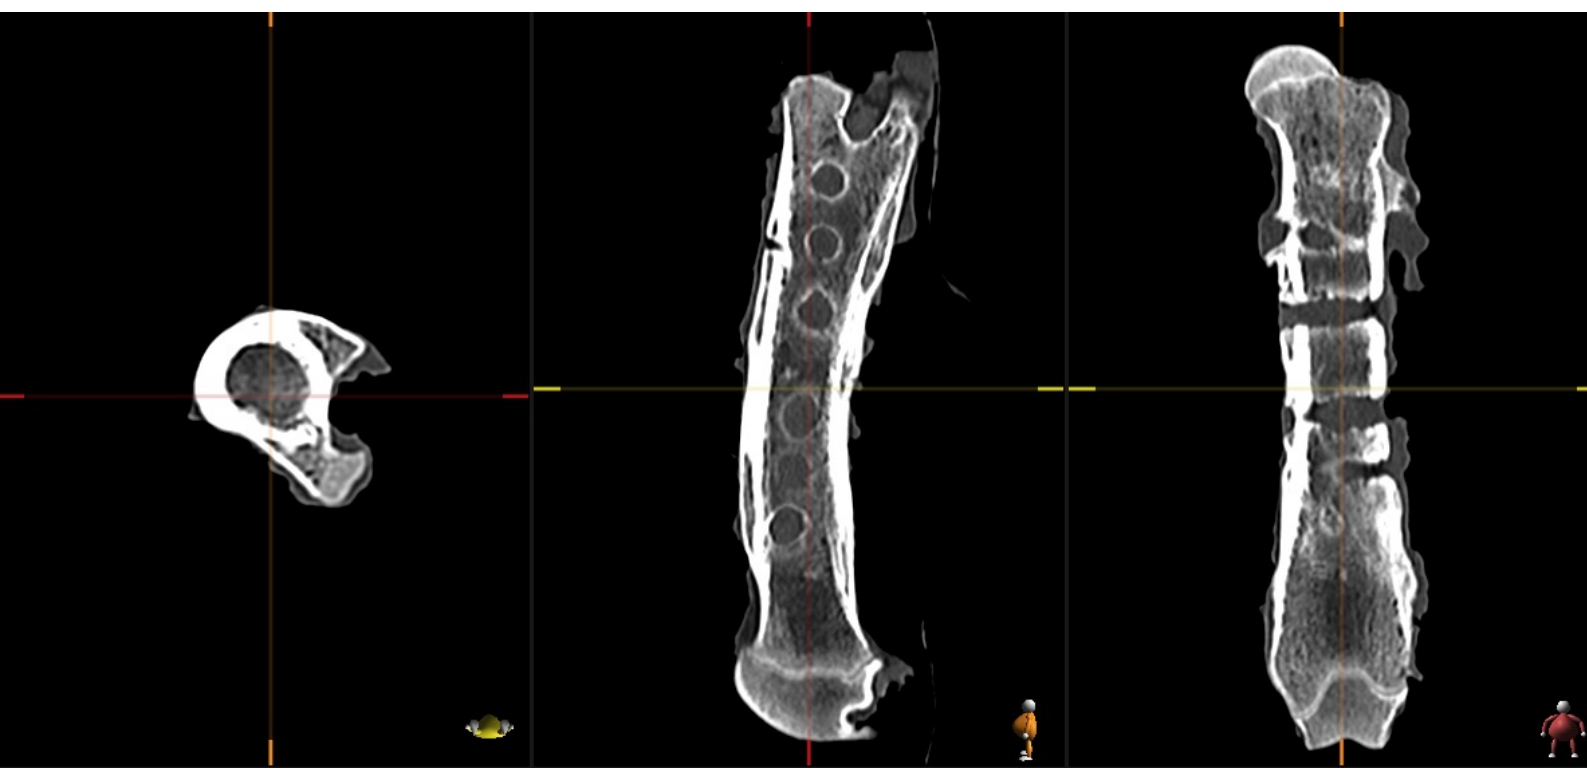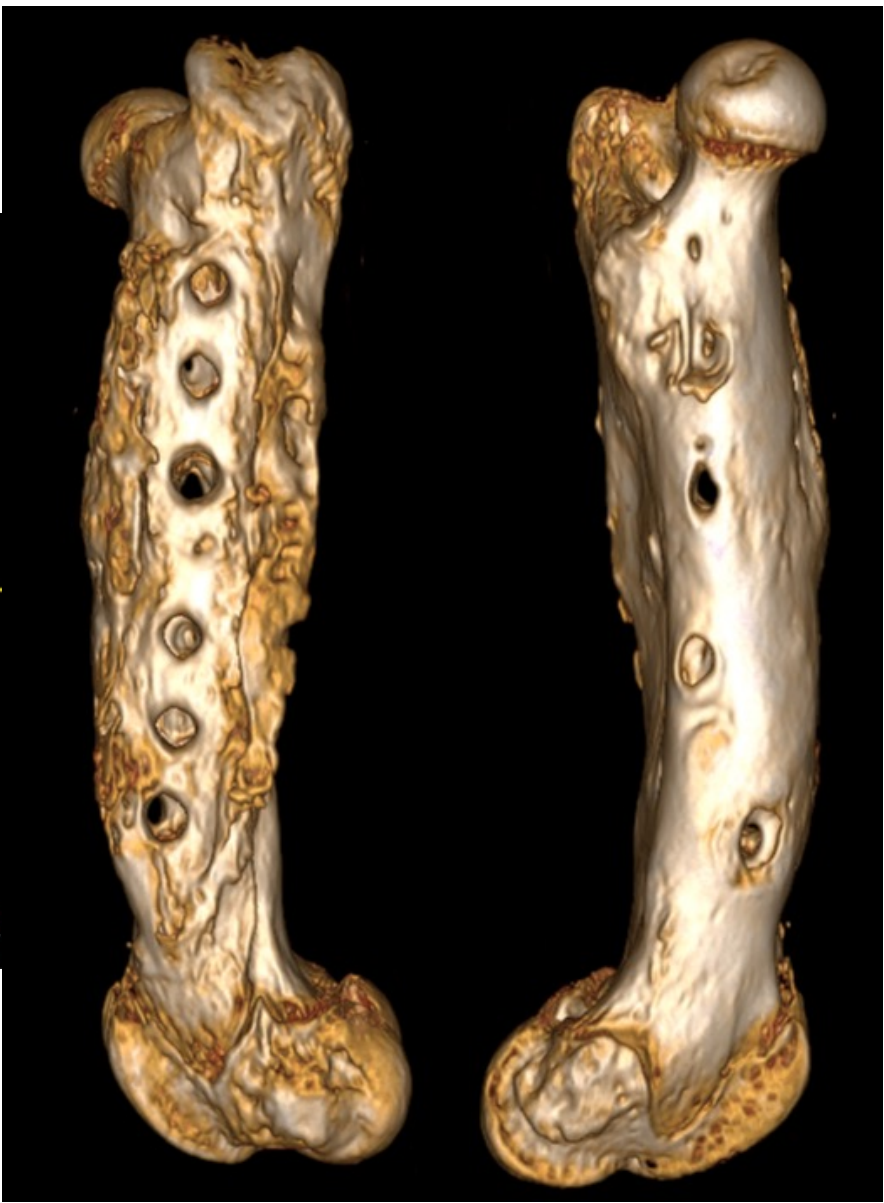

# Infection Group / Infection and Uncoated Plate

Pig No. 31

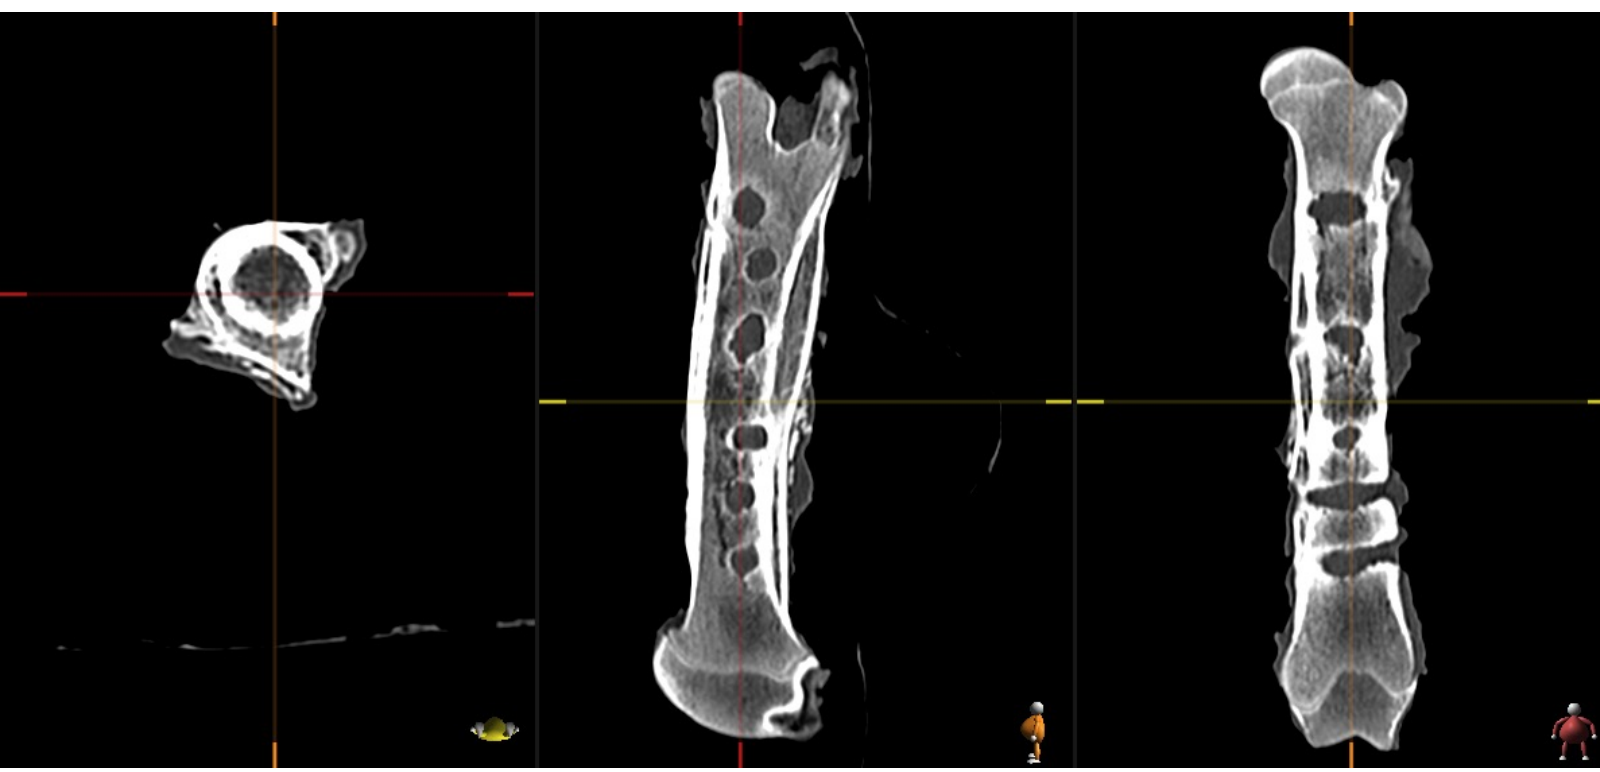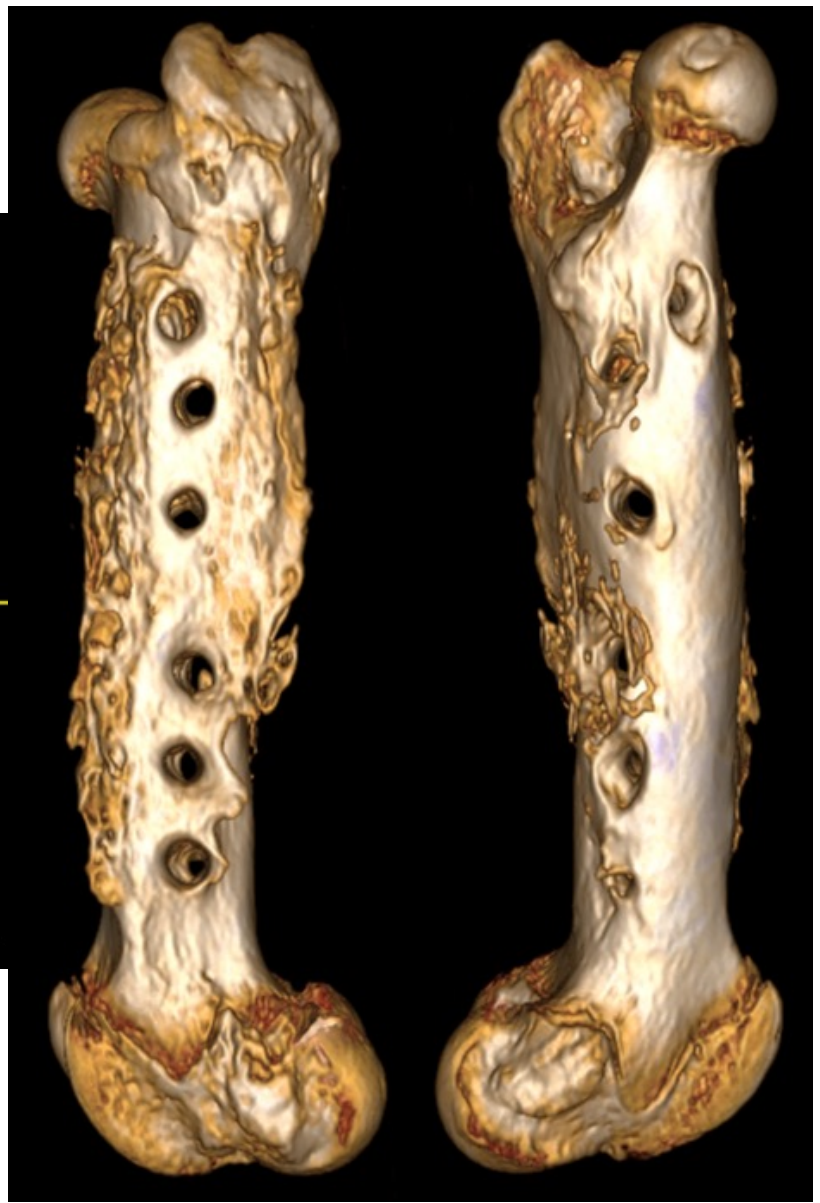



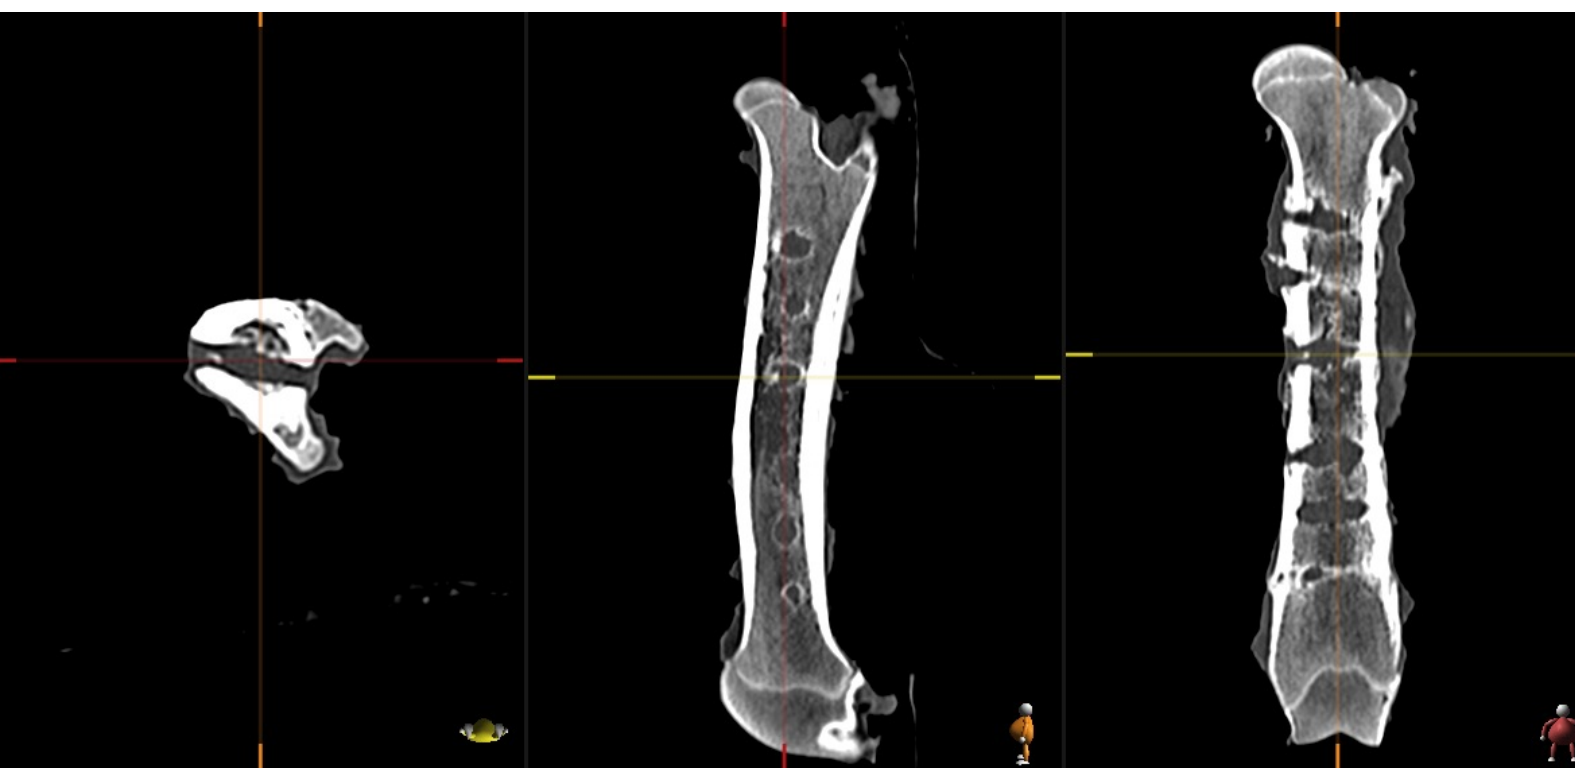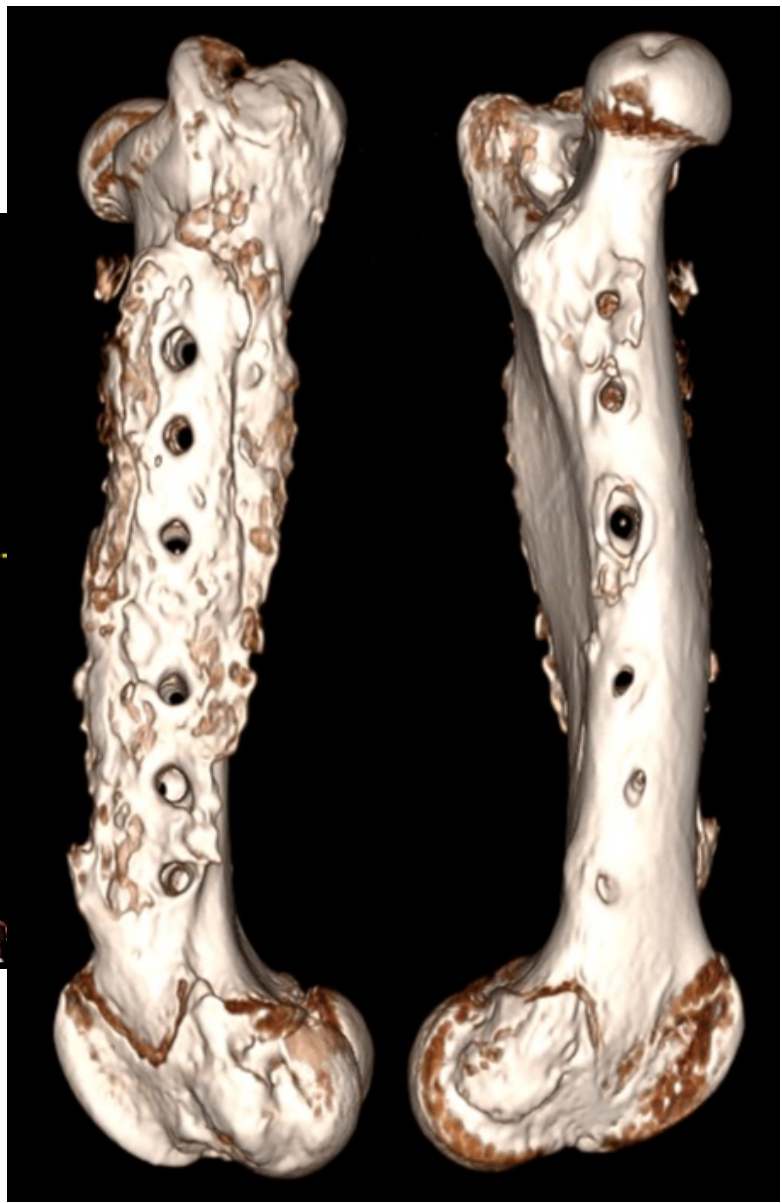



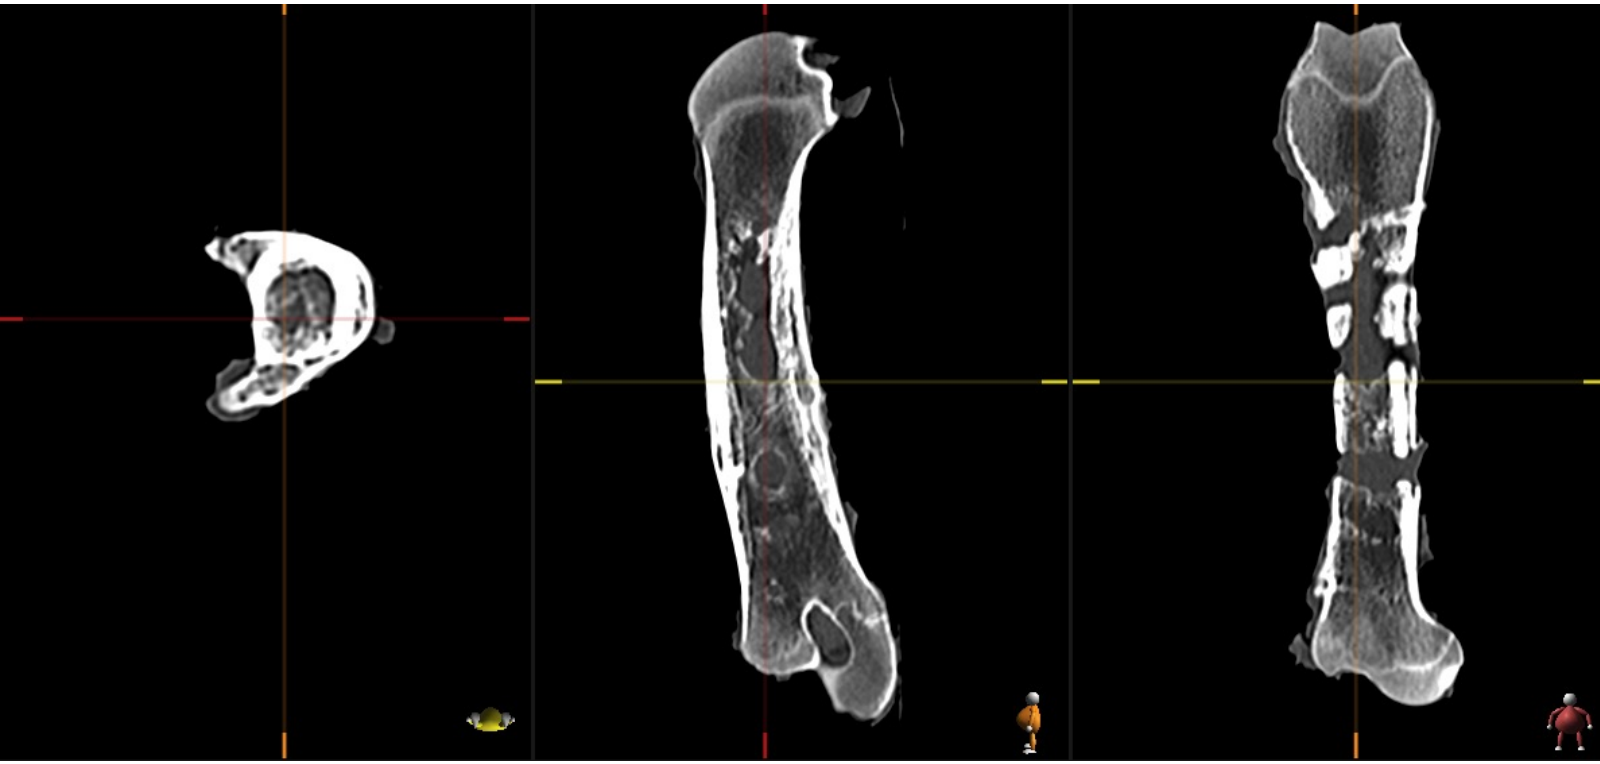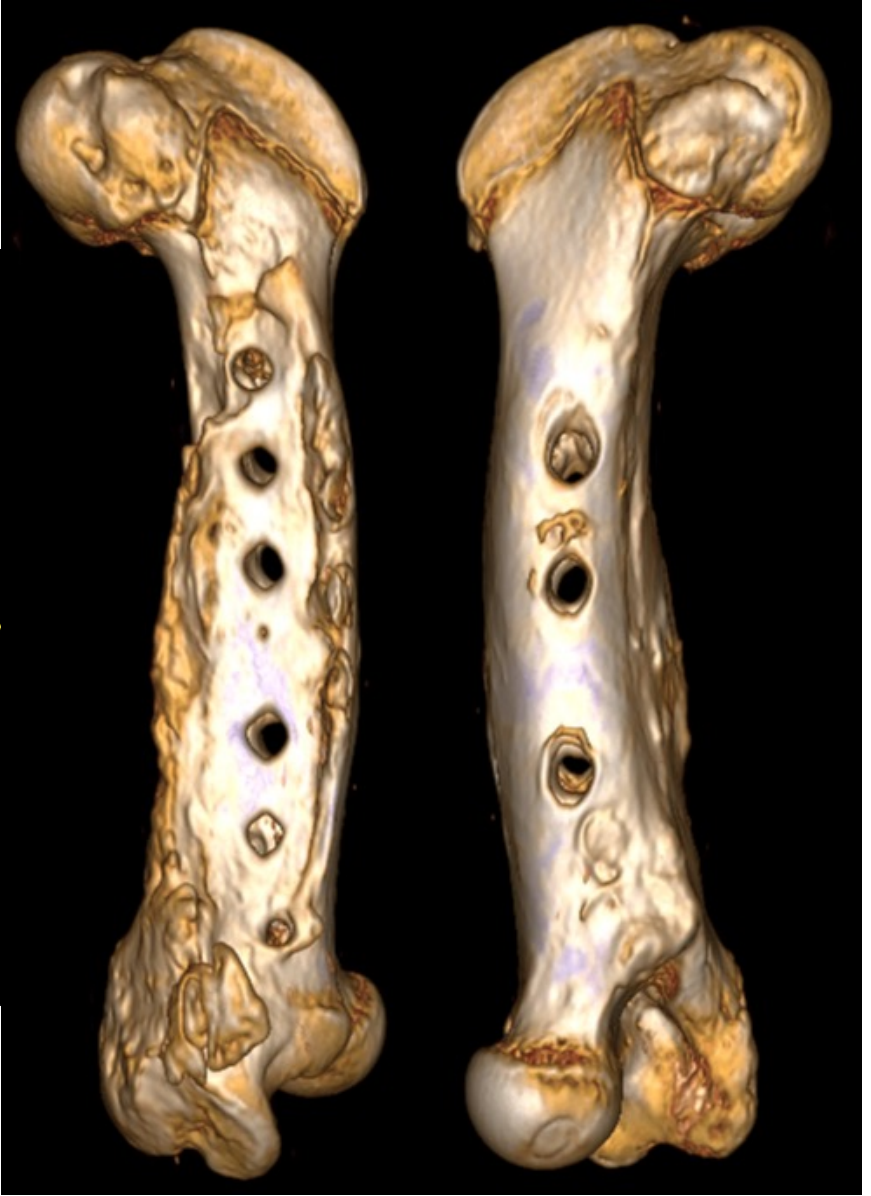

Lysostaphin Group / Infection and Coated Plate  
Fig No. 19

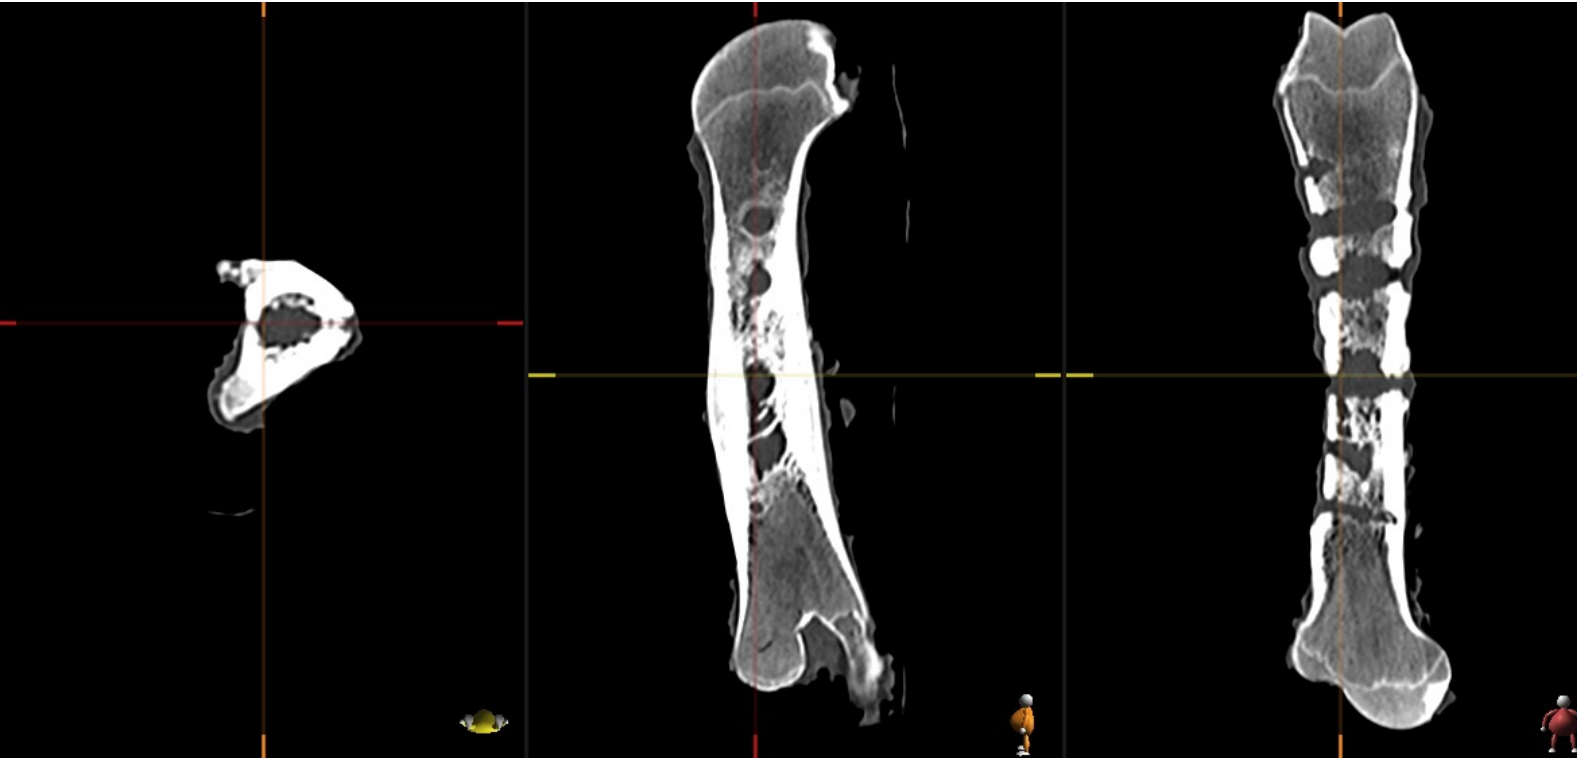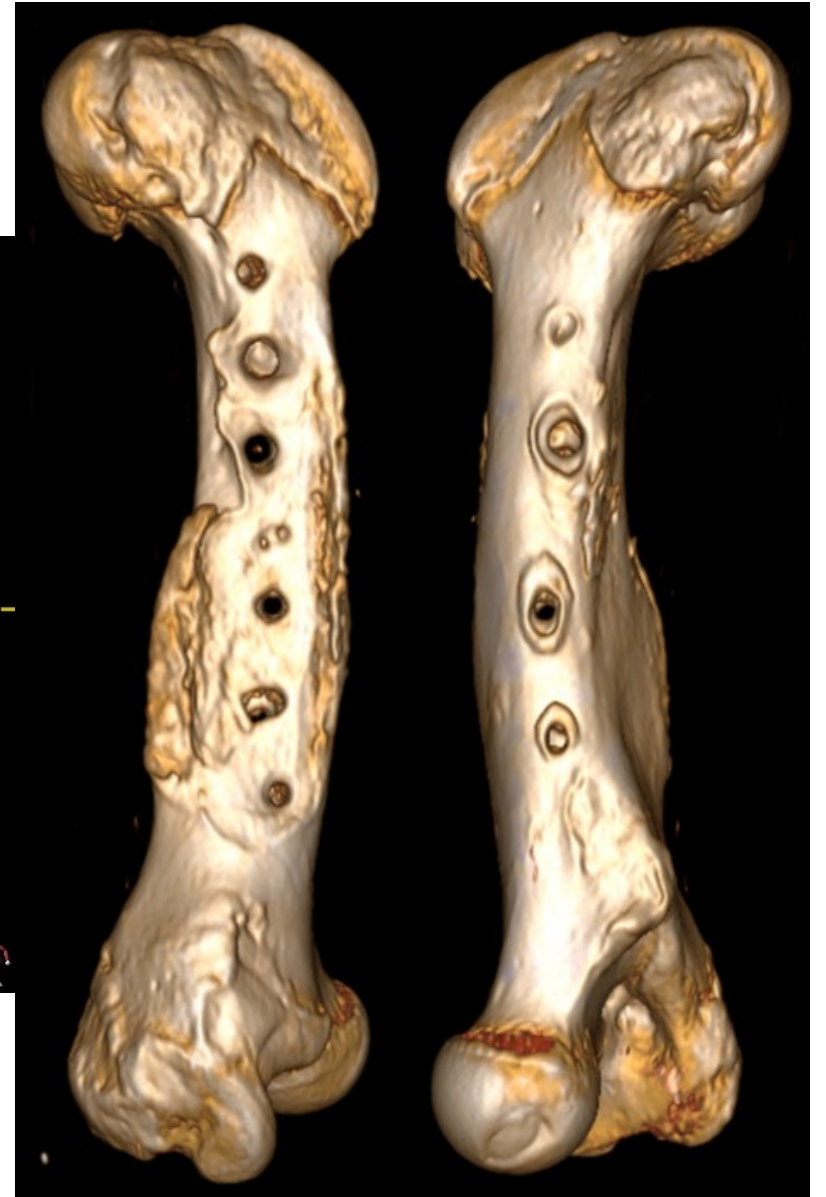

Lysostaphin Group / Infection and Coated Plate  
Fig No. 20

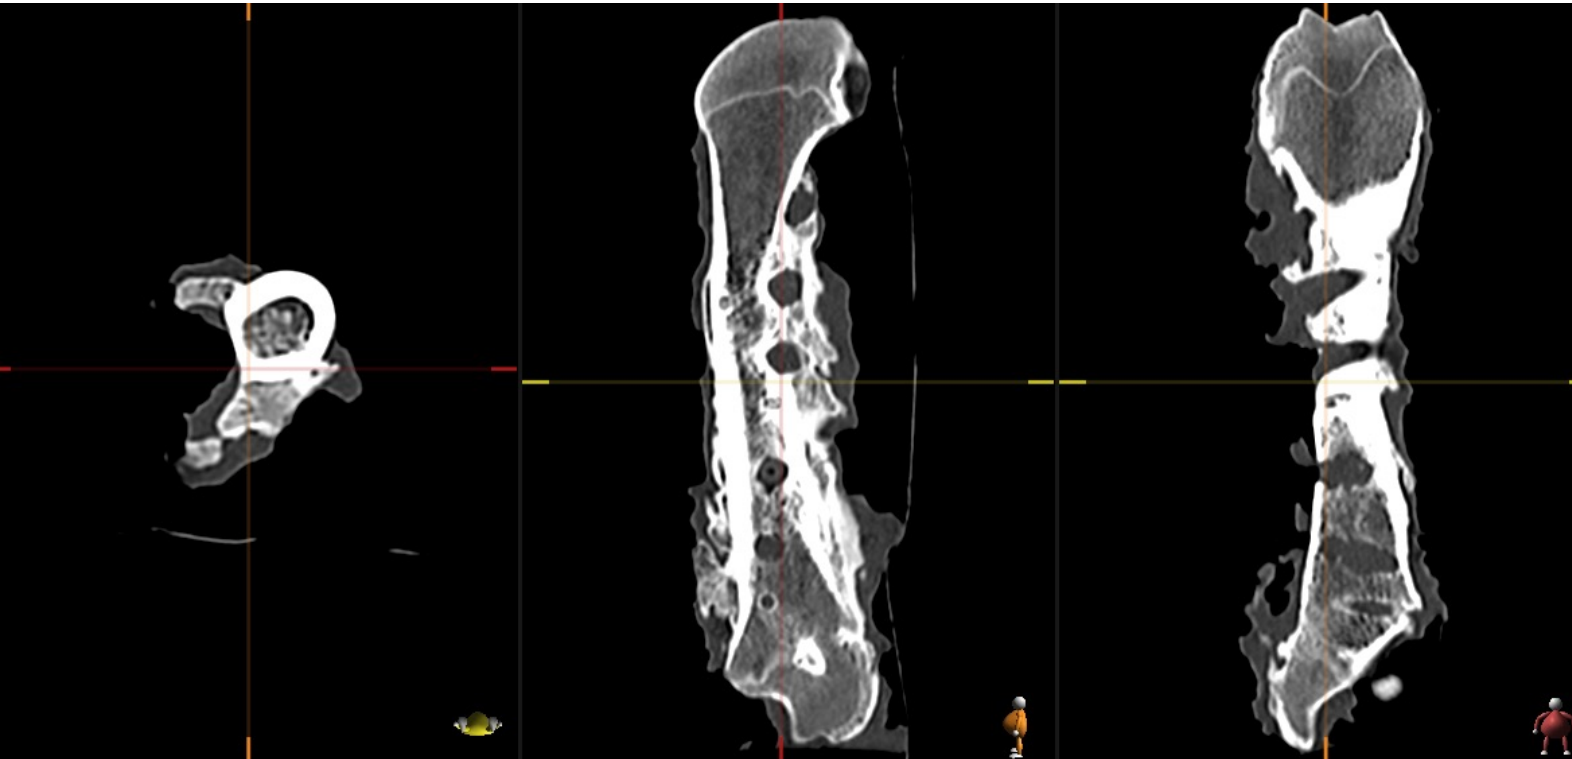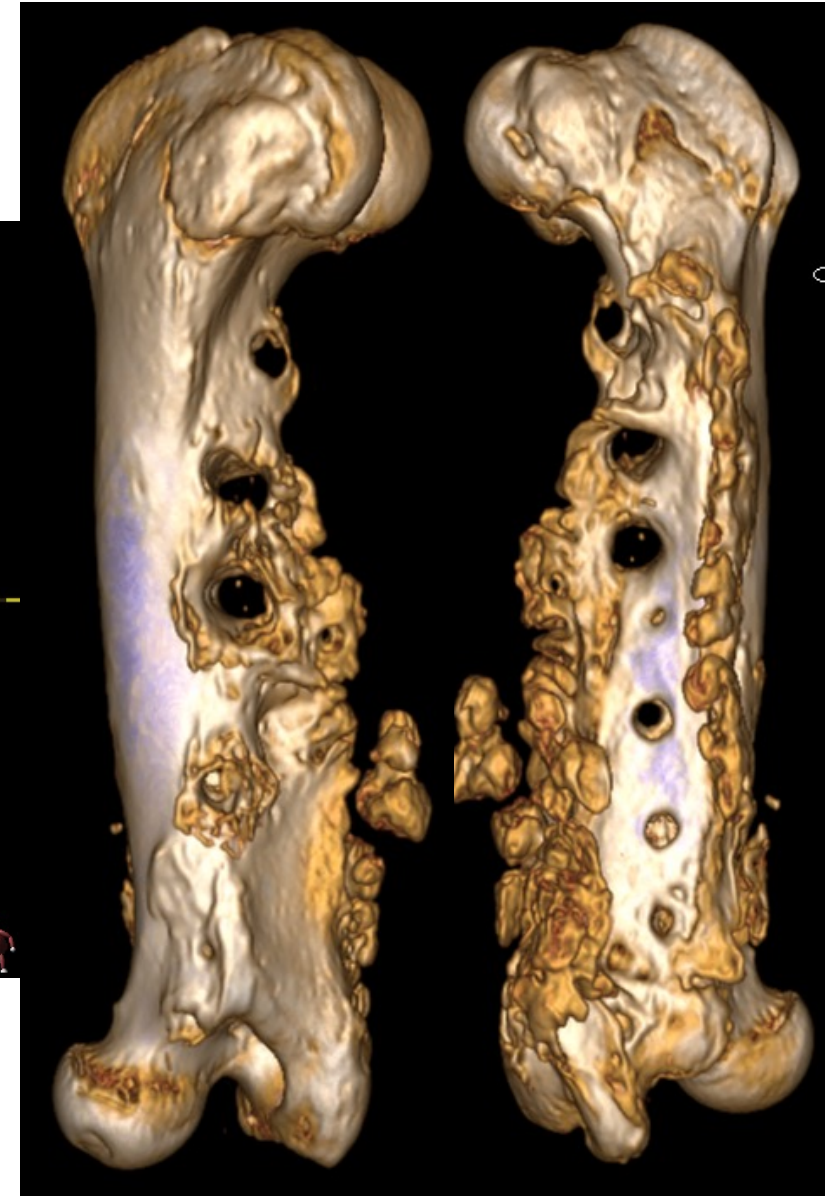



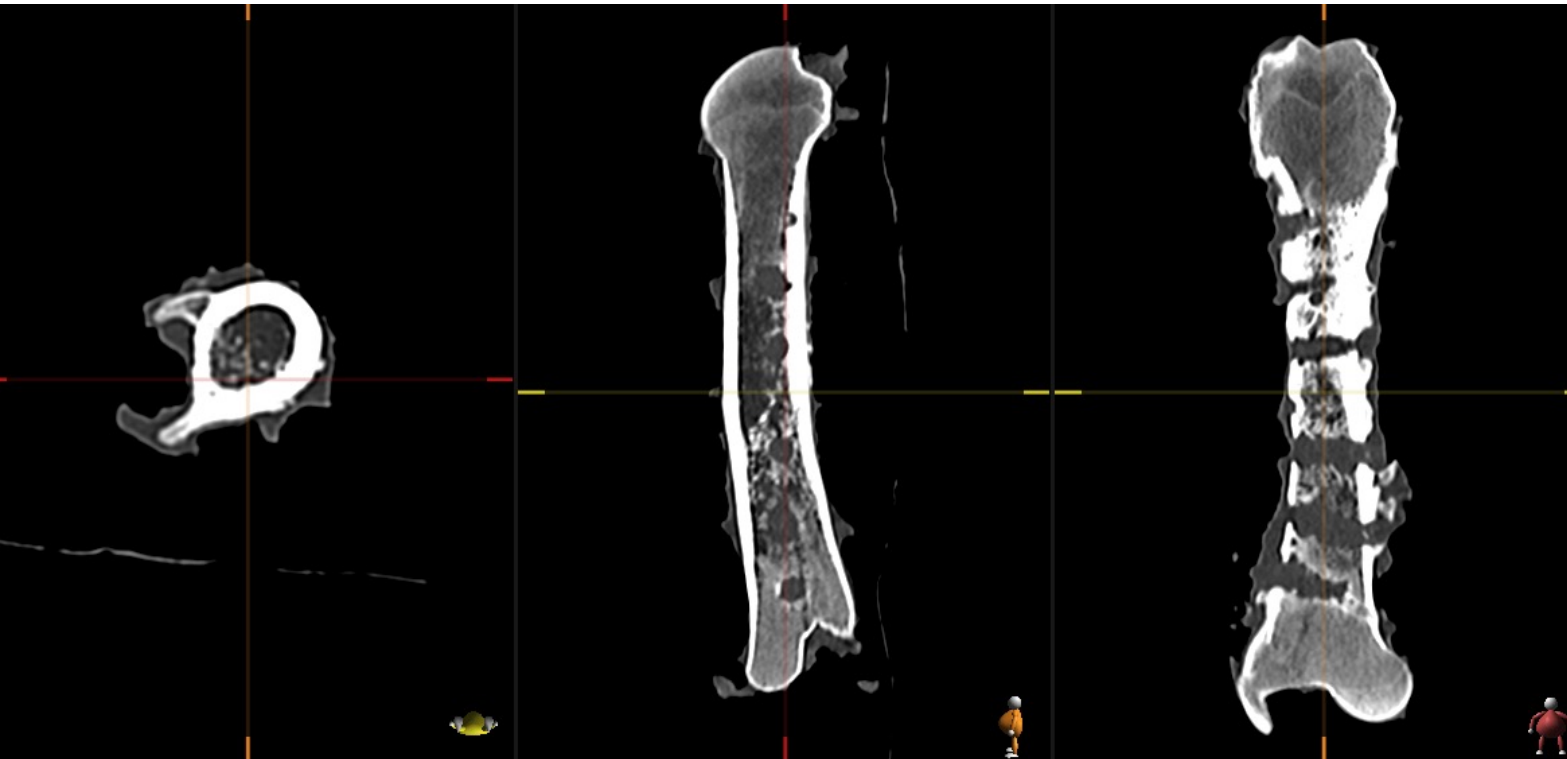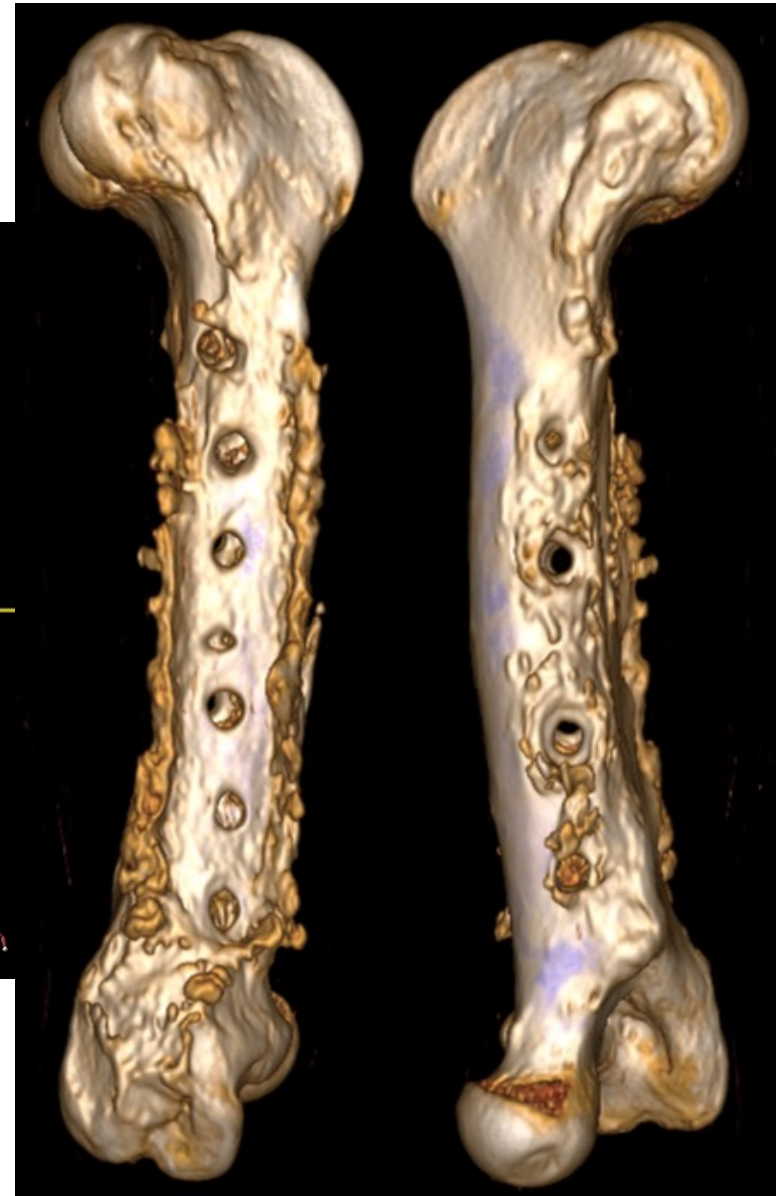

Lysostaphin Group / Infection and Coated Plate  
Fig No. 22

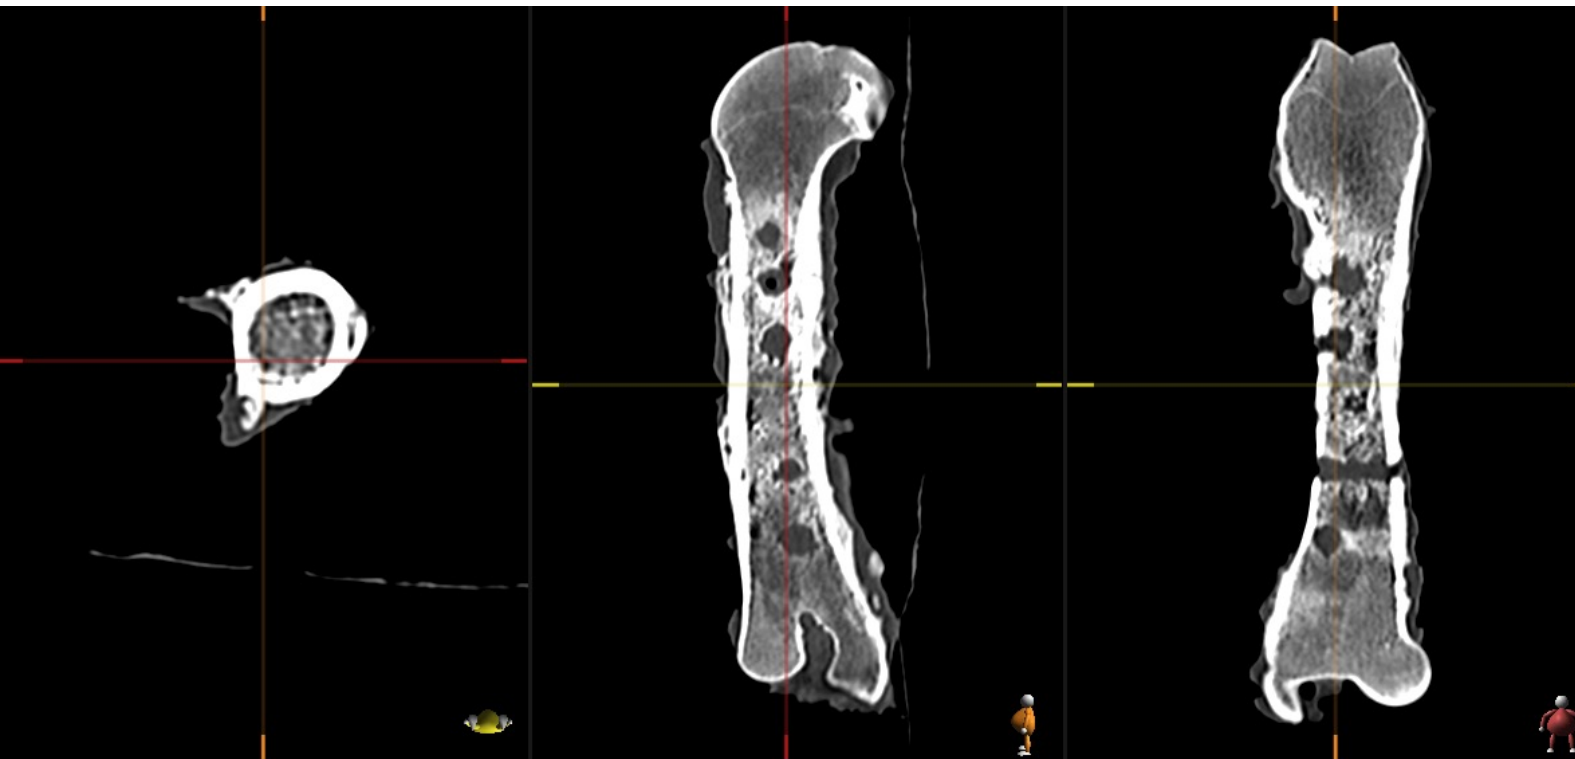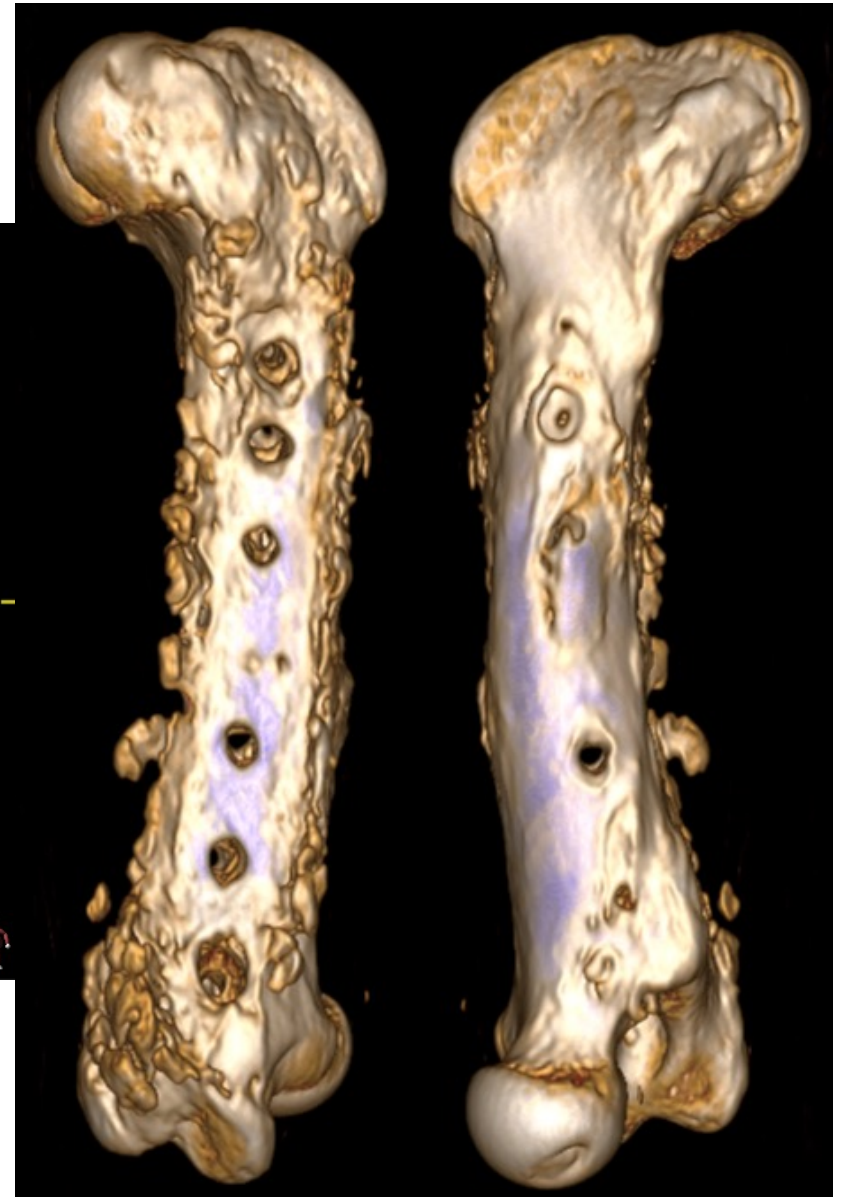

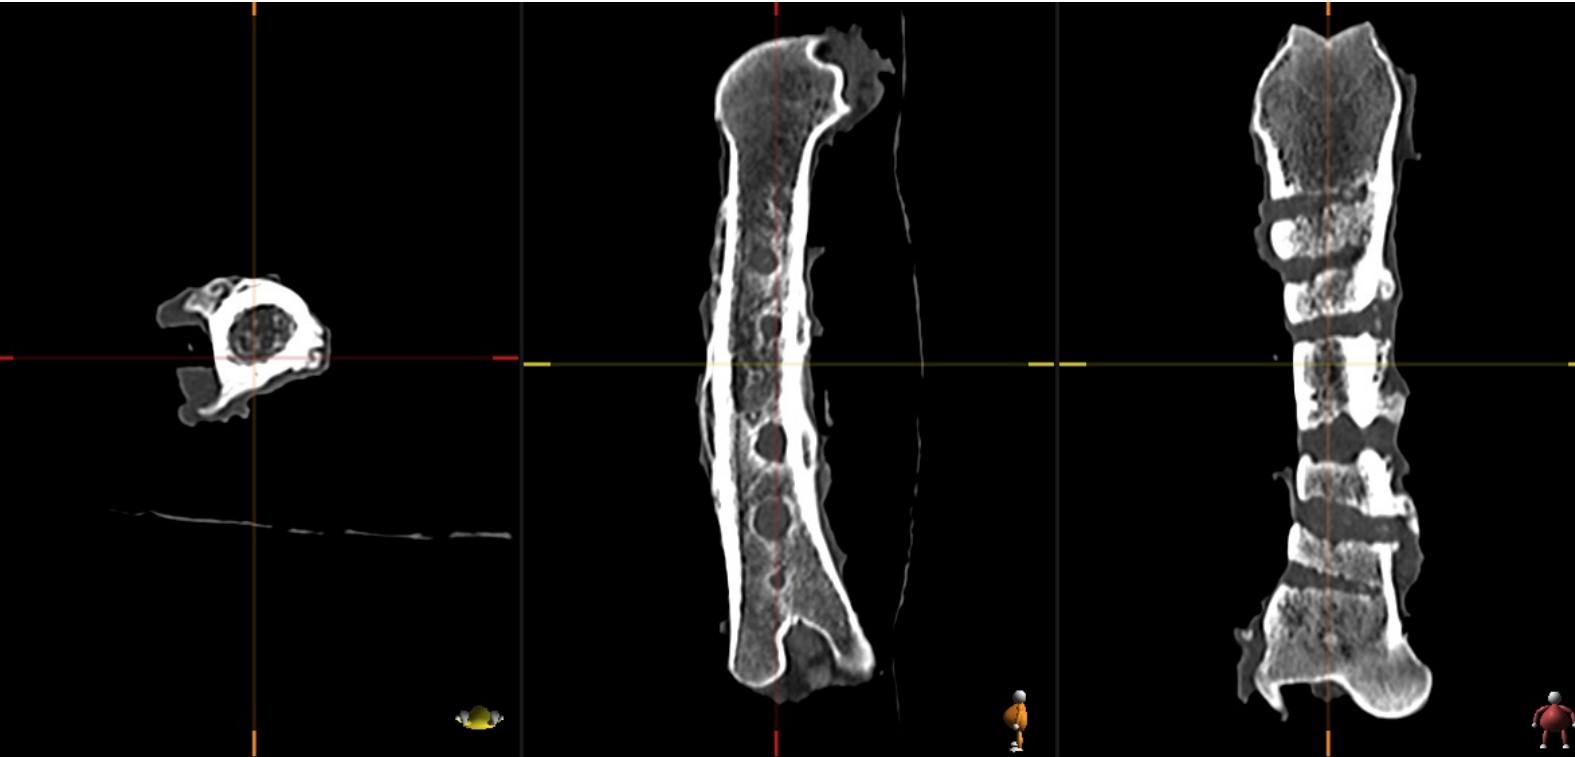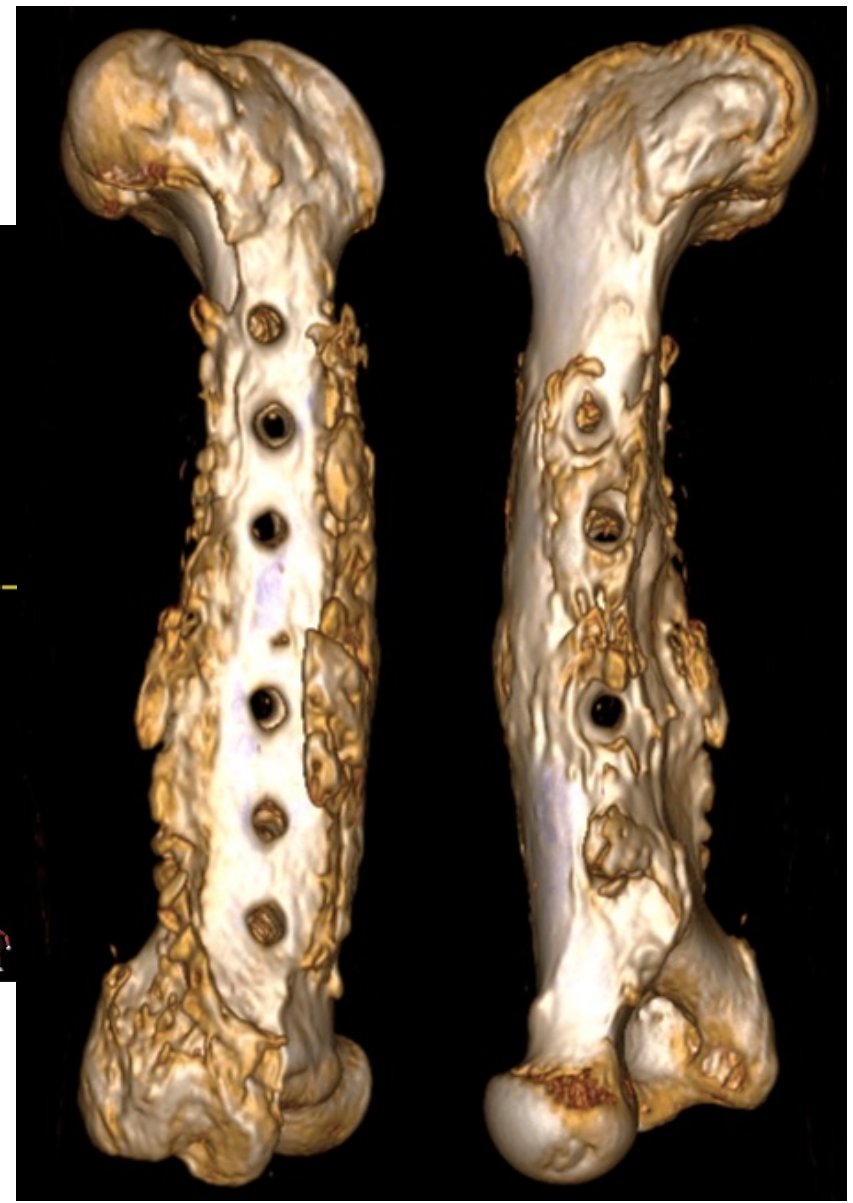



Lysostaphin Group / Infection and Coated Plate  
Fig No. 24

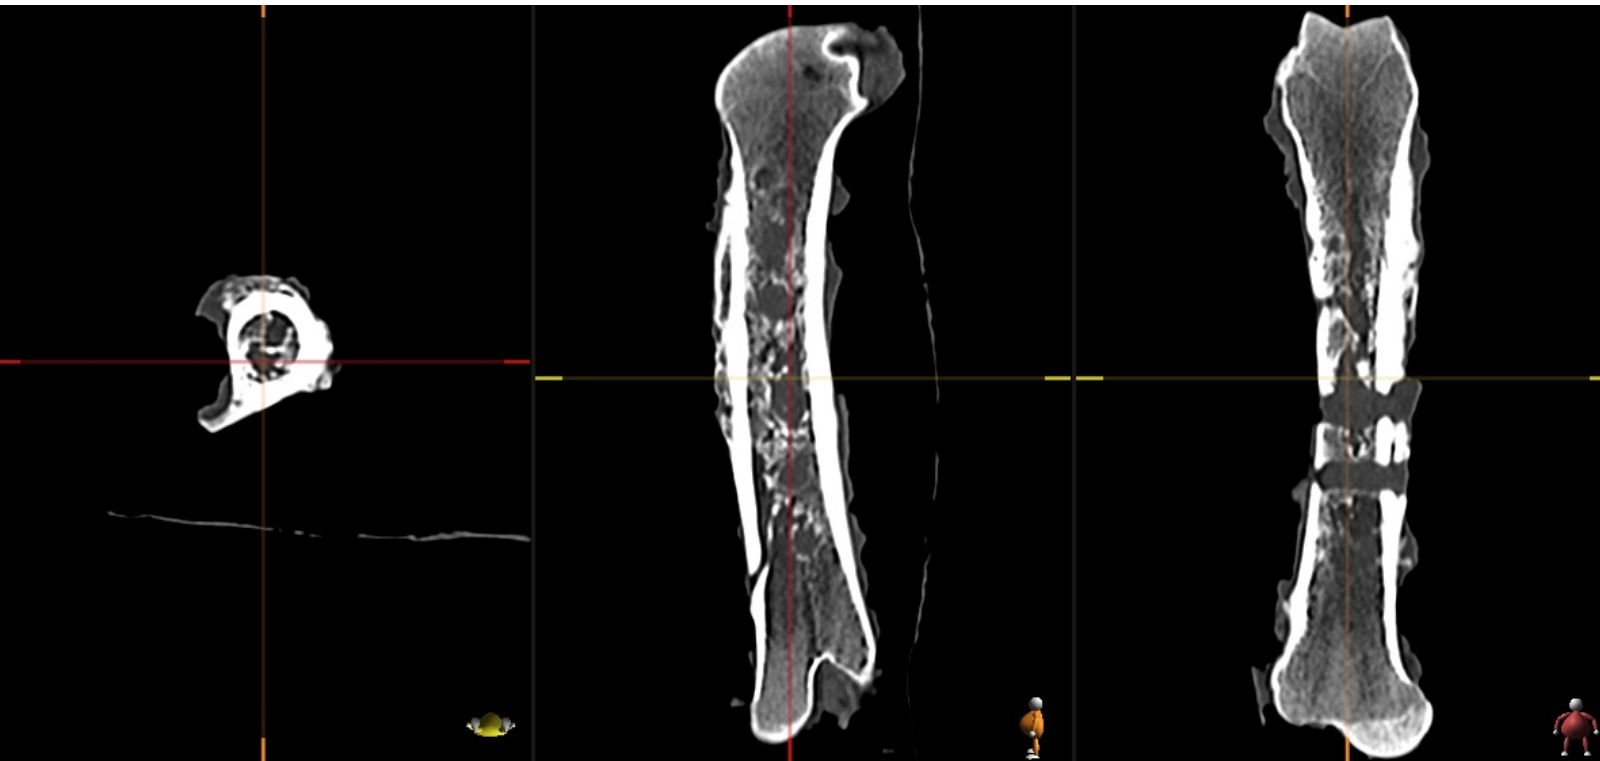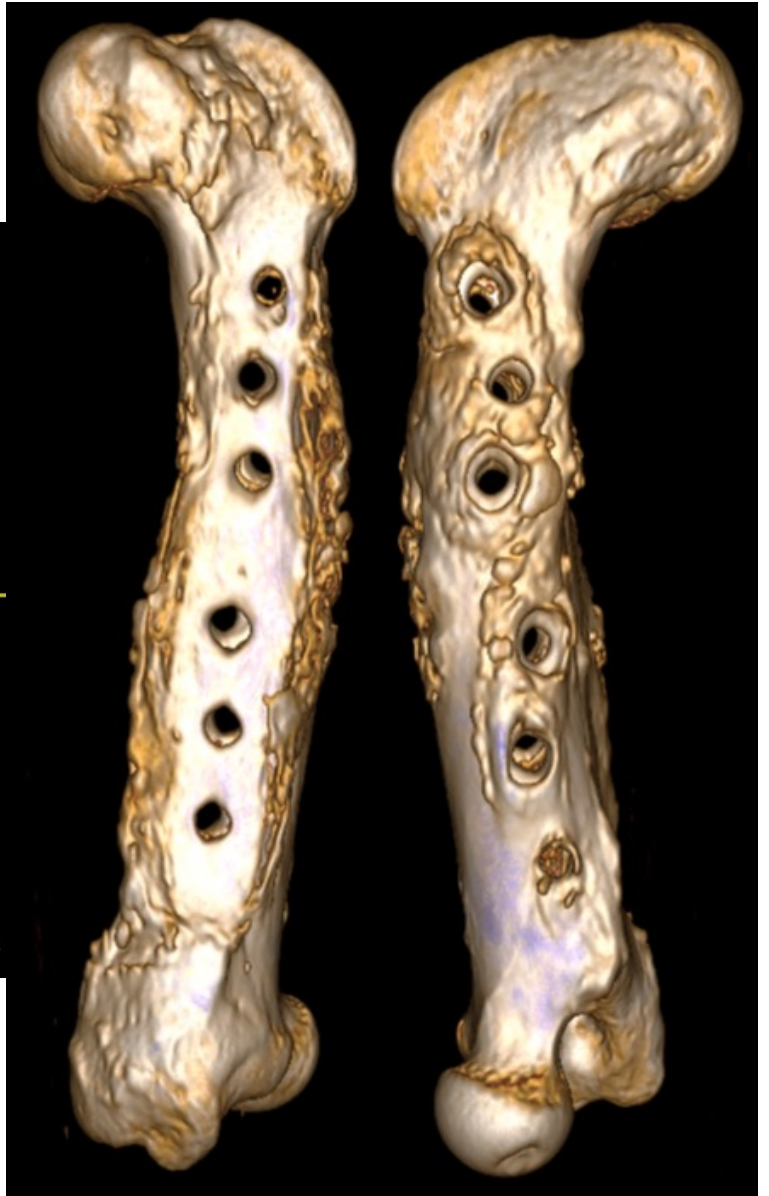

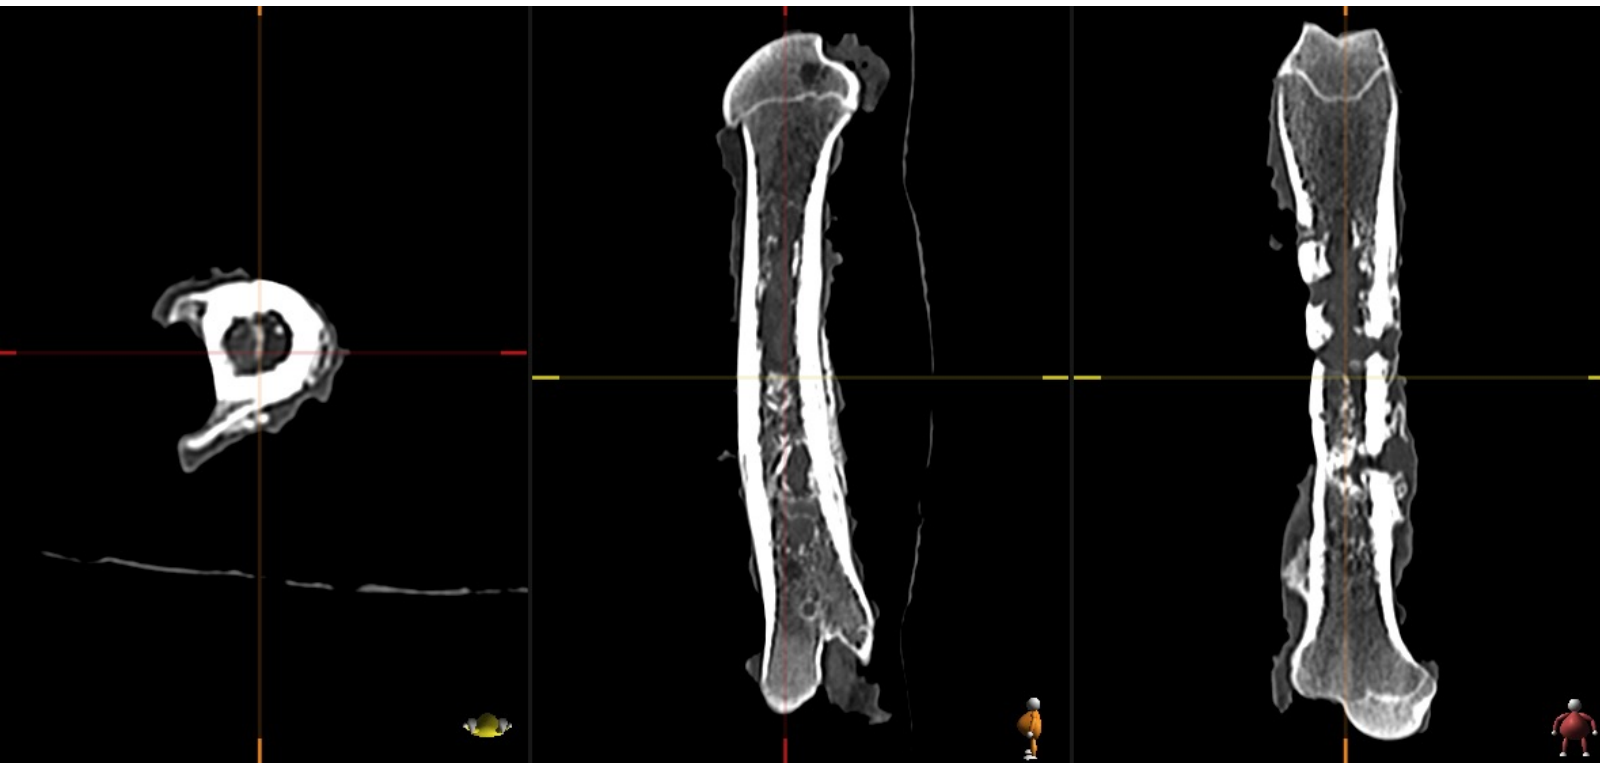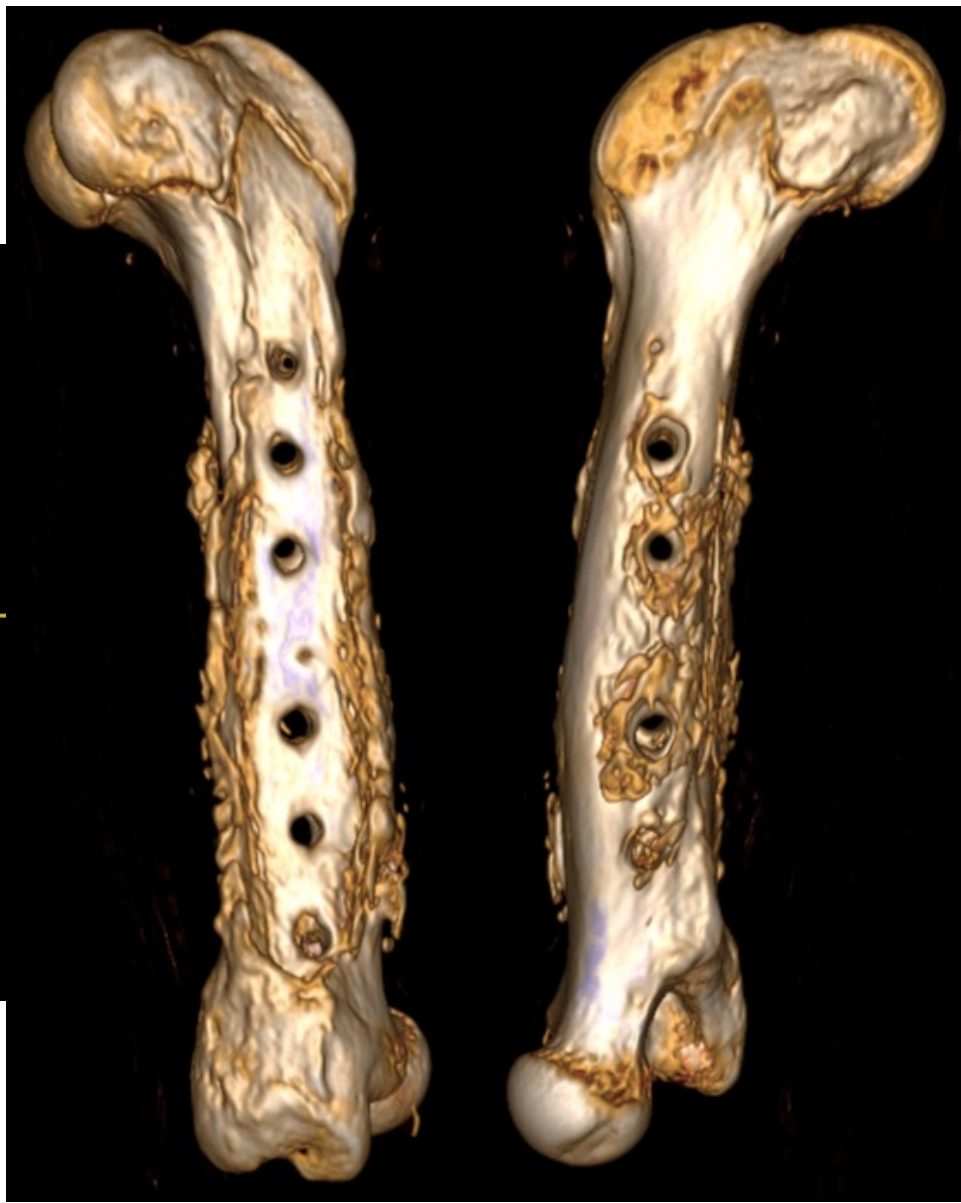

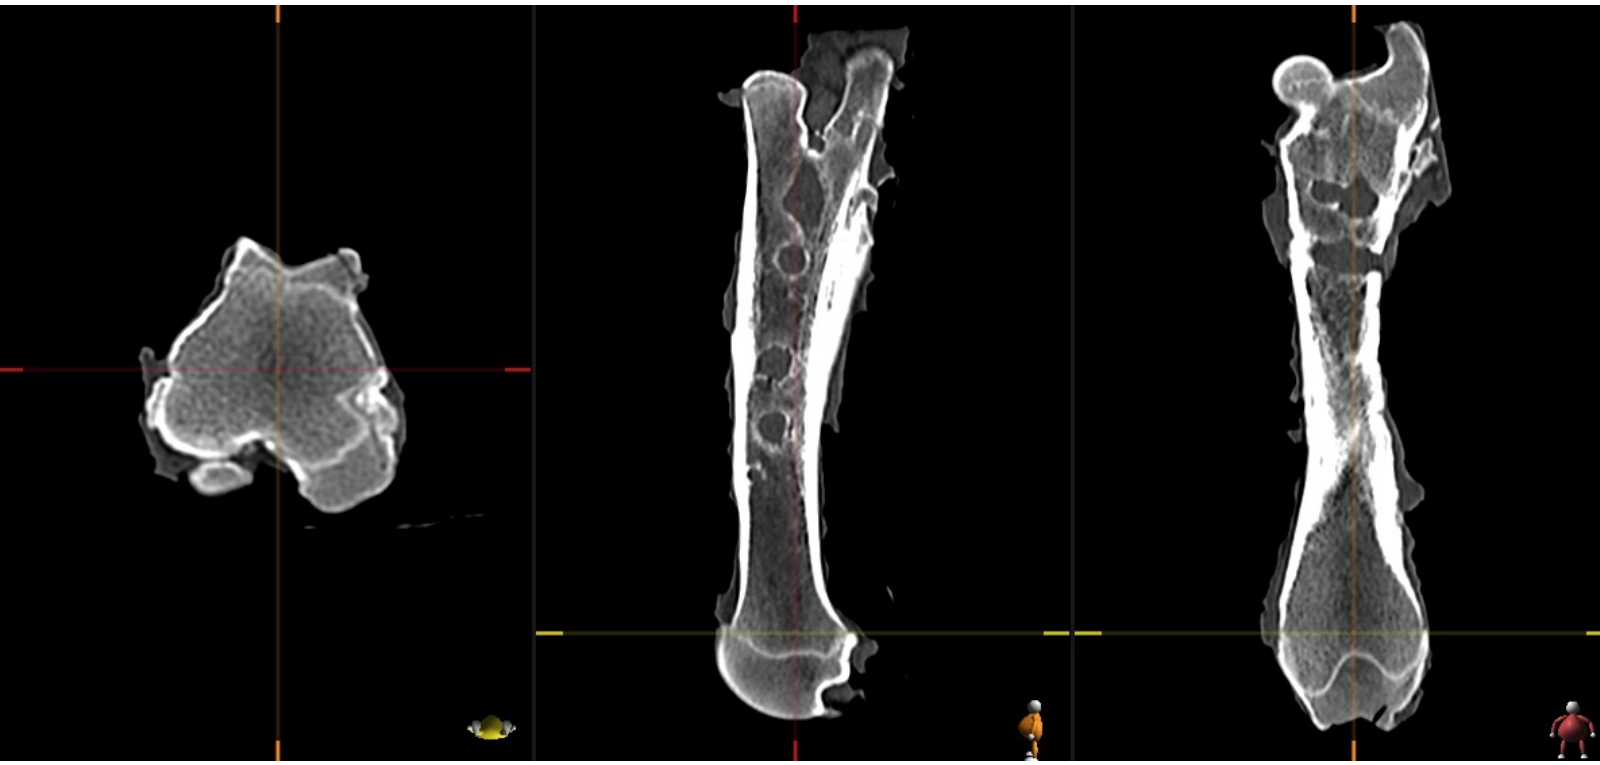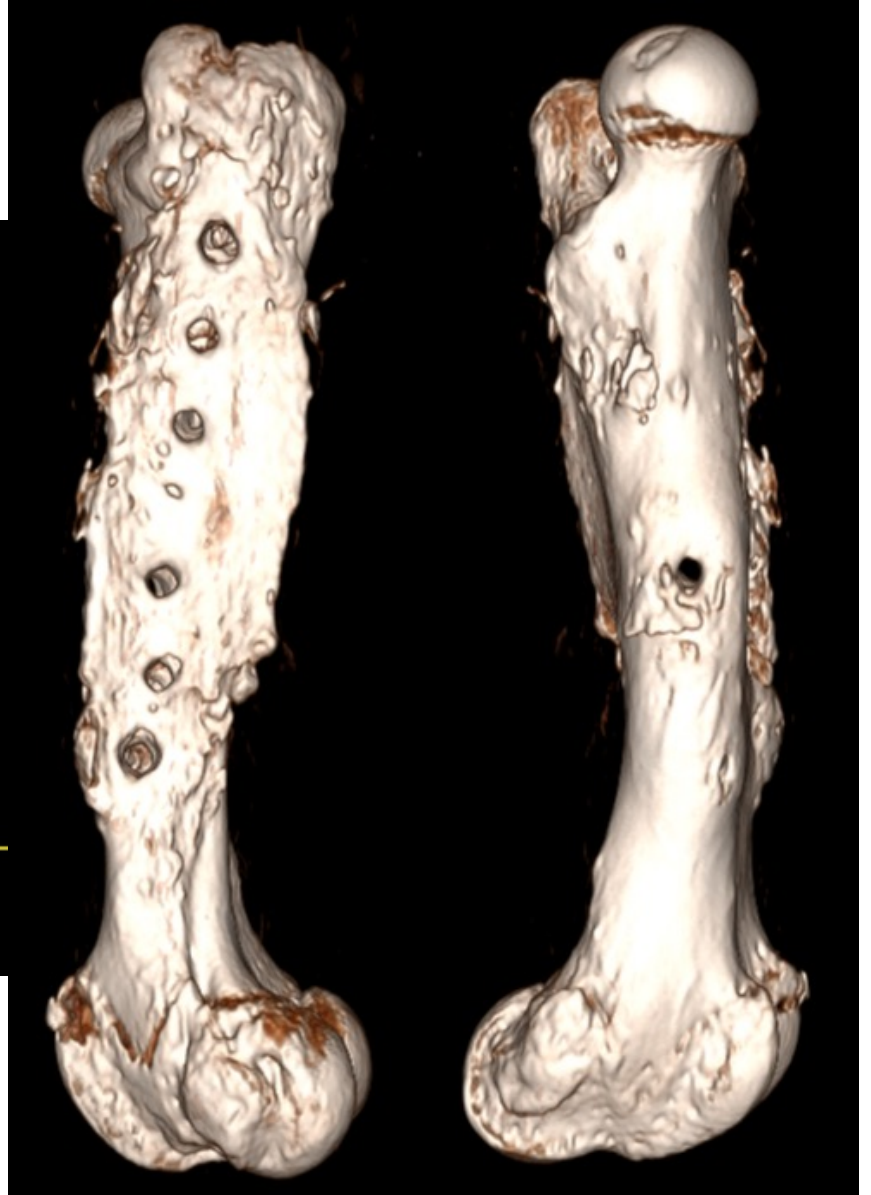



Lysostaphin Group / Infection and Coated Plate  
Fig No. 27

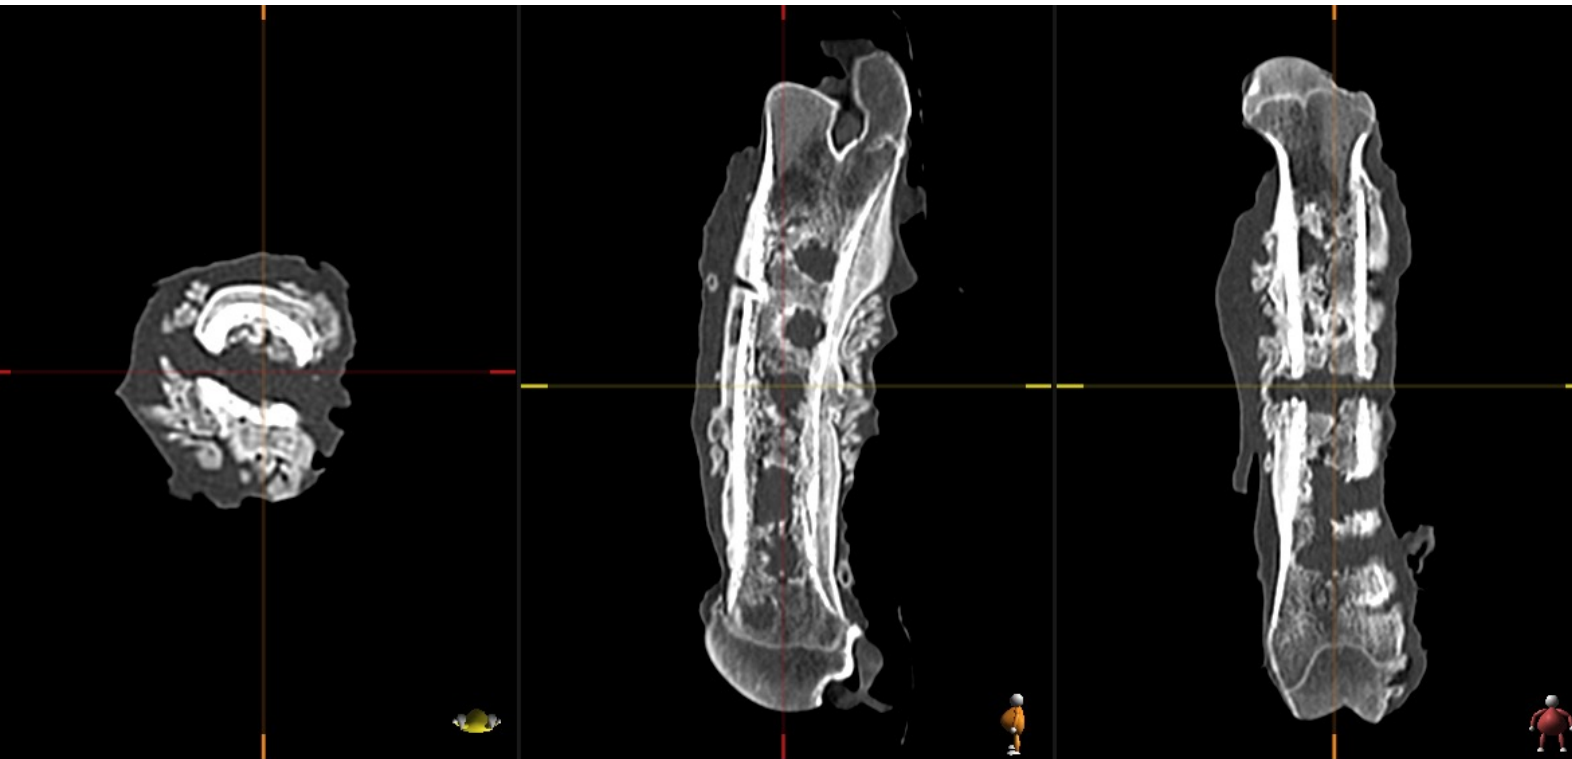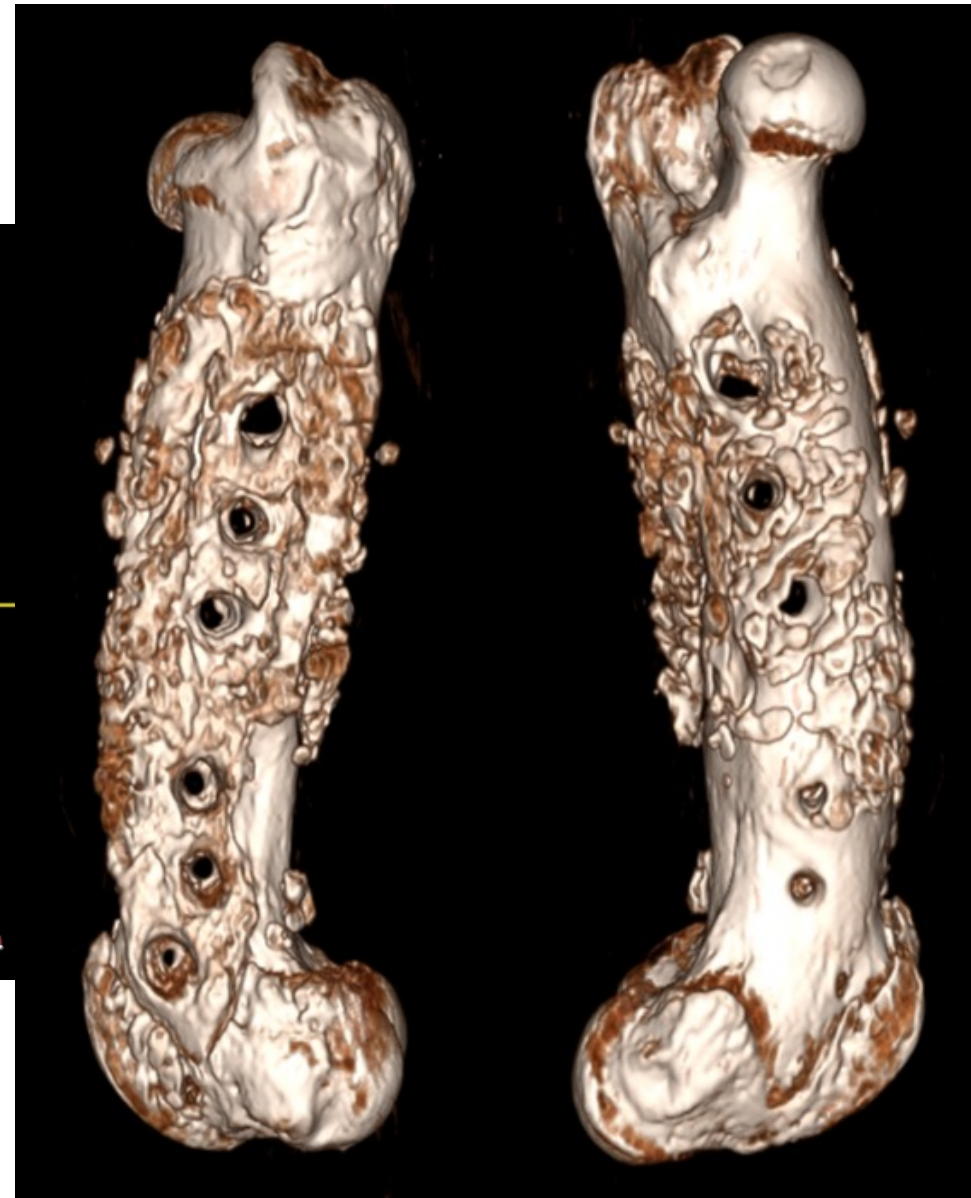

Supplement: MOESM1 [file 26657654]
